# Supplementary material for: Protection against Plasmodium falciparum malaria by PfSPZ Vaccine
Source: JCI journal article supplement (doi:10.1172/jci.insight.89154), 2017-01-11
Supplement: sd1 [file 1]

**Supplementary Appendix for**

**Protection against *Plasmodium falciparum* malaria by PfSPZ Vaccine**

Authors: Epstein JE et al.

## Table of Contents

|                                               |    |
|-----------------------------------------------|----|
| 1. Supplementary Tables and Figures.....      | 3  |
| 2. Supplementary Materials and Methods: ..... | 32 |
| 3. Supplementary Results .....                | 41 |
| 4. References .....                           | 44 |
| 5. Additional Acknowledgements .....          | 46 |

## 1. Supplementary Tables and Figures

**Table S1. Metadata and SNP count relative to 3D7 for 19 clinical isolates and 2 culture-adapted strains of *P. falciparum*.** Data obtained from Genbank's Short Read Archive (<http://www.ncbi.nlm.nih.gov/sra/>), and pulled by Experiment Accession ID.

| Sample Accession ID              | Experiment Accession ID         | Source | Read Count  | Bases (Gpb) | Genome Coverage <sup>a</sup> | Total SNPs <sup>b</sup> | SNP Panel <sup>c</sup> |
|----------------------------------|---------------------------------|--------|-------------|-------------|------------------------------|-------------------------|------------------------|
| SAMN02374945                     | SRX364110                       | Mali   | 13,746,800  | 1.4         | 60                           | 17,544                  | 4,330                  |
| SAMN02373818                     | SRX363947                       | Mali   | 17,199,480  | 1.7         | 75                           | 18,834                  | 4,322                  |
| SAMN02373653                     | SRX363851                       | Mali   | 16,876,880  | 1.7         | 73                           | 23,824                  | 4,576                  |
| SAMN02373819                     | SRX363957                       | Mali   | 21,376,140  | 2.2         | 93                           | 23,181                  | 4,767                  |
| SAMN02373656                     | SRX363863                       | Mali   | 17,426,280  | 1.8         | 76                           | 24,033                  | 4,632                  |
| SAMN02373820                     | SRX363963                       | Mali   | 19,739,780  | 2.0         | 86                           | 23,800                  | 4,552                  |
| SAMN02373821                     | SRX363972                       | Mali   | 14,439,220  | 1.5         | 63                           | 20,673                  | 4,502                  |
| SAMN02373822                     | SRX363979                       | Mali   | 22,572,540  | 2.3         | 98                           | 20,845                  | 4,462                  |
| SAMN02374901                     | SRX364033                       | Mali   | 22,217,920  | 2.2         | 96                           | 20,380                  | 4,420                  |
| SAMN02374900                     | SRX364020                       | Mali   | 34,062,020  | 3.4         | 148                          | 21,210                  | 4,556                  |
| SAMN02374902                     | SRX364039                       | Mali   | 14,143,340  | 1.4         | 61                           | 19,580                  | 4,426                  |
| SAMN02374907                     | SRX364050                       | Mali   | 17,353,440  | 1.8         | 75                           | 21,190                  | 4,571                  |
| SAMEA679437                      | ERX005736, ERX007433            | Ghana  | 129,305,774 | 9.8         | 422                          | 23,515                  | 4,906                  |
| SAMEA679680                      | ERX004689, ERX005050            | Uganda | 40,801,074  | 3.1         | 133                          | 22,416                  | 4,918                  |
| SAMEA678966                      | ERX007459, ERX008950            | Kenya  | 58,056,936  | 4.8         | 189                          | 22,909                  | 4,927                  |
| IGS-MLW-001                      | Awaiting SRA #                  | Malawi | 30,179,568  | 3.0         | 131                          | 22,436                  | 4,670                  |
| IGS-MLW-002                      |                                 | Malawi | 36,578,884  | 3.7         | 159                          | 21,852                  | 4,590                  |
| IGS-MLW-003                      |                                 | Malawi | 28,665,742  | 2.9         | 124                          | 21,817                  | 4,774                  |
| IGS-MLW-004                      |                                 | Malawi | 36,874,068  | 3.7         | 160                          | 23,199                  | 4,666                  |
| SAMN01737343 (NF54) <sup>d</sup> | SRX113472, SRX111834            | Africa | 62,292,174  | 6.2         | 270                          | 55                      | 0                      |
| SAMN00765682 (7G8) <sup>d</sup>  | SRX208839, SRX113476, SRX111831 | Brazil | 65,542,020  | 6.6         | 284                          | 22,056                  | 4,925                  |

<sup>a</sup> Genome coverage calculated as: (read count x read length) / length of Pf reference genome.

<sup>b</sup> Total number of SNPs that pass the high-stringency filter used (see methods in Fig. S1).

<sup>c</sup> Subset of all SNPs that fall within the ~1M SNP panel validated by the Sanger Institute (see methods in Fig. S1).

<sup>d</sup> Culture-adapted strain.

**Table S2 Homologous vs. heterologous challenge: 7G8 vs. 3D7.** Of the differences identified genome-wide in 22.1 K nucleotide positions, many correspond to AA differences in key pre-erythrocytic loci. The number of synonymous and non-synonymous differences between the two isolates in 13 pre-erythrocytic antigens is shown.

| Gene                                                                     | PfNF54 vs. Pf7G8 |                |
|--------------------------------------------------------------------------|------------------|----------------|
|                                                                          | Synonymous       | Non-synonymous |
| Circumspozoite protein, <b>CSP</b>                                       | 1                | 8              |
| Sporozoite invasion-associated protein 1, <b>SIAP1</b>                   | 0                | 4              |
| Sporozoite invasion-associated protein-2, <b>SIAP-2</b>                  | 0                | 4              |
| Sporozoite threonine and asparagine-rich protein, <b>STARP</b>           | 2                | 7              |
| Thrombospondin-related anonymous protein, <b>TRAP</b>                    | 1                | 26             |
| Exported protein 1, <b>EXP1</b>                                          | 0                | 1              |
| Cell traversal protein for ookinetes & sporozoites, <b>CellTos</b>       | 0                | 10             |
| Sporozoite microneme protein essential for cell traversal, <b>SPECT1</b> | 0                | 2              |
| Sporozoite microneme protein essential for cell traversal, <b>SPECT2</b> | 1                | 2              |
| Liver stage antigen 1, <b>LSA1</b>                                       | 16               | 22             |
| Liver stage antigen 3, <b>LSA3</b>                                       | 9                | 11             |
| Merozoite surface protein 1, <b>MSP1</b>                                 | 11               | 55             |
| Merozoite surface protein 1, <b>MSP2</b>                                 | 5                | 26             |

**Table S3. Results of CHMI done 3 weeks and 24 weeks after the last dose of PfSPZ Vaccine for the challenged population**

| Group                                                                                                                                        | Total<br>Number<br>of PfSPZ | Pf3D7<br>or<br>Pf7G8<br>for<br>CHMI | Challenged population                          |                     |                     |                                                         |
|----------------------------------------------------------------------------------------------------------------------------------------------|-----------------------------|-------------------------------------|------------------------------------------------|---------------------|---------------------|---------------------------------------------------------|
|                                                                                                                                              |                             |                                     | No. Protected/<br>Number<br>Undergoing<br>CHMI | Protective Efficacy |                     | Median [range]<br>Pre-patent Period (days) <sup>b</sup> |
|                                                                                                                                              |                             |                                     |                                                | %                   | 95% CI <sup>a</sup> |                                                         |
| CHMI 3wks                                                                                                                                    |                             |                                     |                                                |                     |                     |                                                         |
| 1<br>2.7x10 <sup>5</sup> PfSPZ                                                                                                               | 1.35x10 <sup>6</sup>        | 3D7                                 | 12/14                                          | 85.7                | 35.9, 98.2          | 14.2<br>[13.9, 14.4]                                    |
| 3<br>4.5x10 <sup>5</sup> PfSPZ                                                                                                               | 1.35x10 <sup>6</sup>        | 3D7                                 | 13/15                                          | 86.7                | 35.9, 98.3          | 15.4<br>[13.9, 16.9]                                    |
| Controls                                                                                                                                     | -                           | 3D7                                 | 0/6                                            | 0.0                 | -                   | 11.6<br>[10.9, 13.7]                                    |
| 2<br>2.7x10 <sup>5</sup> PfSPZ                                                                                                               | 1.35x10 <sup>6</sup>        | 7G8                                 | 4/5                                            | 80.0                | 10.4, 99.5          | 11.9*                                                   |
| Controls                                                                                                                                     | -                           | 7G8                                 | 0/4                                            | 0.0                 | -                   | 11.9<br>[9.8, 12.9]                                     |
| CHMI 24wks                                                                                                                                   |                             |                                     |                                                |                     |                     |                                                         |
| 1<br>2.7x10 <sup>5</sup> PfSPZ                                                                                                               | 1.35x10 <sup>6</sup>        | 3D7                                 | 7/11                                           | 63.6                | 7.9, 89.1           | 15.2<br>[12.0, 17.0]                                    |
| 3<br>4.5x10 <sup>5</sup> PfSPZ                                                                                                               | 1.35x10 <sup>6</sup>        | 3D7                                 | 8/14                                           | 57.1                | 8.7, 82.3           | 14.0<br>[11.9, 15.0]                                    |
| Controls                                                                                                                                     | -                           | 3D7                                 | 0/6                                            | 0.0                 | -                   | 11.6<br>[10.9, 14.0]                                    |
| 2<br>2.7x10 <sup>5</sup> PfSPZ                                                                                                               | 1.35x10 <sup>6</sup>        | 7G8                                 | 1/11                                           | 9.1                 | -41.9, 35.6         | 11.9<br>[10.9, 13.5]                                    |
| Controls                                                                                                                                     | -                           | 7G8                                 | 0/6                                            | 0.0                 | -                   | 10.9<br>[9.8, 11.7]                                     |
| a Confidence intervals are calculated by inverting two one-sided tests for the score statistic.                                              |                             |                                     |                                                |                     |                     |                                                         |
| b Includes only subjects who developed parasitemia. Groups with a single subject who developed parasitemia are indicated by an asterisk (*). |                             |                                     |                                                |                     |                     |                                                         |

**Table S4. Protection and parasitemia status (a) and protection, antibody, and cellular immune response status for all subjects in the trial at the time of CHMI 1 (b) and CHMI 2 (c). Protection and parasitemia status of controls are listed in (d).**

a.

| PfSPZ/<br>Dose                                                              | ID      | Protection |     | Prepatent Period (days) |       |        |       | Parasite Density (parasites/ $\mu$ L) |                   |                   |                   |                   |                   |
|-----------------------------------------------------------------------------|---------|------------|-----|-------------------------|-------|--------|-------|---------------------------------------|-------------------|-------------------|-------------------|-------------------|-------------------|
|                                                                             |         | CHMI       |     | CHMI 1                  |       | CHMI 2 |       | CHMI 1                                |                   |                   | CHMI 2            |                   |                   |
|                                                                             |         | 1          | 2   | PCR                     | TBS   | PCR    | TBS   | By PCR<br>at PCR+                     | By PCR<br>at TBS+ | By TBS at<br>TBS+ | By PCR<br>at PCR+ | By PCR<br>at TBS+ | By TBS<br>at TBS+ |
| Group<br>1: 5<br>doses<br>of<br>$2.7 \times 10^5$<br>PfSPZ<br>(3D7<br>CHMI) | 1001    | Yes        | Yes | .                       | .     | .      | .     | .                                     | .                 | .                 | .                 | .                 | .                 |
|                                                                             | 1002    | Yes        | No  | .                       | .     | 14.98  | 16.95 | .                                     | .                 | .                 | 4.94              | 35.97             | 17.3              |
|                                                                             | 1004    | Yes        | No  | .                       | .     | 13.08  | 14.95 | .                                     | .                 | .                 | 12.28             | 111.98            | 30.3              |
|                                                                             | 1005    | Yes        | Yes | .                       | .     | .      | .     | .                                     | .                 | .                 | .                 | .                 | .                 |
|                                                                             | 1006*   | No         | No  | 10.95                   | 14.43 | 7.00   | 11.98 | 2.33                                  | 324.50            | 36.36             | 0.33              | 241.87            | 54.5              |
|                                                                             | 1007    | No         | .   | 10.91                   | 13.92 | .      | .     | 3.59                                  | 301.22            | 25.97             | .                 | .                 | .                 |
|                                                                             | 1015    | Yes        | .   | .                       | .     | .      | .     | .                                     | .                 | .                 | .                 | .                 | .                 |
|                                                                             | 1018    | Yes        | Yes | .                       | .     | .      | .     | .                                     | .                 | .                 | .                 | .                 | .                 |
|                                                                             | 1019    | Yes        | No  | .                       | .     | 11.99  | 15.36 | .                                     | .                 | .                 | 0.80              | 25.53             | 30.3              |
|                                                                             | 1020    | Yes        | .   | .                       | .     | .      | .     | .                                     | .                 | .                 | .                 | .                 | .                 |
|                                                                             | 1025    | Yes        | Yes | .                       | .     | .      | .     | .                                     | .                 | .                 | .                 | .                 | .                 |
|                                                                             | 1026    | Yes        | Yes | .                       | .     | .      | .     | .                                     | .                 | .                 | .                 | .                 | .                 |
|                                                                             | 1032    | Yes        | Yes | .                       | .     | .      | .     | .                                     | .                 | .                 | .                 | .                 | .                 |
|                                                                             | 1034    | Yes        | Yes | .                       | .     | .      | .     | .                                     | .                 | .                 | .                 | .                 | .                 |
|                                                                             | Median  |            |     | 10.93                   | 14.17 | 12.53  | 15.16 |                                       |                   |                   |                   |                   |                   |
|                                                                             | MedianA |            |     | 10.91                   | 13.92 | 13.08  | 15.36 |                                       |                   |                   |                   |                   |                   |
| Group<br>2: 5<br>doses<br>of<br>$2.7 \times 10^5$<br>PfSPZ<br>(7G8<br>CHMI) | 1009*   | .          | No  | .                       | .     | 6.86   | 11.89 | .                                     | .                 | .                 | 5.74              | 6768.50           | 4398.3            |
|                                                                             | 1010    | Yes        | No  | .                       | .     | 8.03   | 11.45 | .                                     | .                 | .                 | 5.04              | 67.80             | 72.7              |
|                                                                             | 1012    | Yes        | No  | .                       | .     | 7.99   | 10.90 | .                                     | .                 | .                 | 2.45              | 67.80             | 17.3              |
|                                                                             | 1014**  | NC         | NC  | .                       | .     | .      | .     | .                                     | .                 | .                 | .                 | .                 | .                 |
|                                                                             | 1016    | .          | No  | .                       | .     | 9.93   | 13.45 | .                                     | .                 | .                 | 6.27              | 7.04              | 2350.6            |
|                                                                             | 1017    | .          | No  | .                       | .     | 8.92   | 11.92 | .                                     | .                 | .                 | 1.68              | 998.87            | 145.5             |
|                                                                             | 1022    | .          | No  | .                       | .     | 6.88   | 12.06 | .                                     | .                 | .                 | 0.60              | 7599.72           | 6748.9            |
|                                                                             | 1023    | Yes        | Yes | .                       | .     | .      | .     | .                                     | .                 | .                 | .                 | .                 | .                 |
|                                                                             | 1024    | Yes        | No  | .                       | .     | 8.99   | 10.97 | .                                     | .                 | .                 | 2.65              | 11.13             | 36.4              |
|                                                                             | 1029    | .          | No  | .                       | .     | 8.91   | 12.02 | .                                     | .                 | .                 | 1.78              | 971.97            | 72.7              |
|                                                                             | 1030    | No         | No  | 8.90                    | 11.95 | 8.95   | 12.02 | 2.32                                  | 793.08            | 200.00            | 1.49              | 1296.79           | 745.5             |
|                                                                             | 1033    | .          | No  | .                       | .     | 9.87   | 11.90 | .                                     | .                 | .                 | 5.77              | 341.01            | 181.8             |
|                                                                             | Median  |            |     | 8.90                    | 11.95 | 8.91   | 11.91 |                                       |                   |                   |                   |                   |                   |
|                                                                             | MedianA |            |     | 8.90                    | 11.95 | 8.92   | 11.92 |                                       |                   |                   |                   |                   |                   |
| Group<br>3: 3<br>doses<br>of<br>$4.5 \times 10^5$<br>PfSPZ<br>(3D7<br>CHMI) | 1031    | Yes        | Yes | .                       | .     | .      | .     | .                                     | .                 | .                 | .                 | .                 | .                 |
|                                                                             | 1035    | Yes        | No  | .                       | .     | 7.07   | 13.98 | .                                     | .                 | .                 | 0.45              | 5322.37           | 3610.4            |
|                                                                             | 1036    | Yes        | Yes | .                       | .     | .      | .     | .                                     | .                 | .                 | .                 | .                 | .                 |
|                                                                             | 1037    | Yes        | No  | .                       | .     | 10.97  | 13.99 | .                                     | .                 | .                 | 5.63              | 339.03            | 86.6              |
|                                                                             | 1038    | Yes        | No  | .                       | .     | 9.01   | 14.01 | .                                     | .                 | .                 | 0.01              | 392.23            | 90.9              |
|                                                                             | 1039    | Yes        | Yes | .                       | .     | .      | .     | .                                     | .                 | .                 | .                 | .                 | .                 |
|                                                                             | 1040    | Yes        | No  | .                       | .     | 11.00  | 14.99 | .                                     | .                 | .                 | 2.18              | 95.68             | 17.3              |
|                                                                             | 1041    | No         | Yes | 13.87                   | 16.88 | .      | .     | 0.70                                  | 596.19            | 90.91             | .                 | .                 | .                 |
|                                                                             | 1042    | Yes        | No  | .                       | .     | 8.87   | 11.93 | .                                     | .                 | .                 | 0.17              | 99.95             | 54.5              |
|                                                                             | 1043    | Yes        | Yes | .                       | .     | .      | .     | .                                     | .                 | .                 | .                 | .                 | .                 |
|                                                                             | 1045    | Yes        | No  | .                       | .     | 8.93   | 13.99 | .                                     | .                 | .                 | 0.55              | 453.12            | 54.5              |
|                                                                             | 1046    | Yes        | Yes | .                       | .     | .      | .     | .                                     | .                 | .                 | .                 | .                 | .                 |
|                                                                             | 1047    | Yes        | Yes | .                       | .     | .      | .     | .                                     | .                 | .                 | .                 | .                 | .                 |
|                                                                             | 1048    | No         | .   | 6.90                    | 13.88 | .      | .     | 0.90                                  | 1138.26           | 290.91            | .                 | .                 | .                 |
|                                                                             | 1049    | Yes        | Yes | .                       | .     | .      | .     | .                                     | .                 | .                 | .                 | .                 | .                 |
|                                                                             | Median  |            |     | 10.39                   | 15.38 | 8.97   | 13.99 |                                       |                   |                   |                   |                   |                   |

MedianA = median for analysis population. Median = median for the challenged population.

\*Subject did not receive the full dosage according to their respective group.

\*\*Subject was excluded from the analysis population due to non-compliance (NC= non-complaint).

b.

| PfSPZ/<br>Dose                                                           | ID               | Protection |     | 2 weeks post final immunization |       |       |                          |               |       |     |        |                    |        |
|--------------------------------------------------------------------------|------------------|------------|-----|---------------------------------|-------|-------|--------------------------|---------------|-------|-----|--------|--------------------|--------|
|                                                                          |                  | CHMI       |     | PfCSP OD 1.0                    |       | aIFA  | ISI<br>(%<br>Inhibition) | IFN- $\gamma$ |       | IL2 |        | IFN- $\gamma$ /IL2 |        |
|                                                                          |                  | 1          | 2   | Net                             | Ratio |       |                          | Net           | Ratio | Net | Ratio  | Net                | Ratio  |
| Group 1:<br>5 doses<br>of<br>$2.7 \times 10^5$<br>PfSPZ<br>(3D7<br>CHMI) | 1001             | Yes        | Yes | 2627                            | 21    | 7244  | 17.88                    | 27            | 3     | 148 | 148*** | 23                 | 23***  |
|                                                                          | 1002             | Yes        | No  | 21576                           | 720   | 34440 | 75.39                    | 316           | 48    | 331 | 93     | 118                | 118*** |
|                                                                          | 1004             | Yes        | No  | 2142                            | 62    | 3357  | 50.84                    | 40            | 30    | 123 | 64     | 17                 | 17***  |
|                                                                          | 1005             | Yes        | Yes | 882                             | 16    | 1676  | 0                        | -1            | 1     | 41  | 8      | 2                  | 2      |
|                                                                          | 1006*            | No         | No  | 11894                           | 57    | 17252 | 88.10                    | 143           | 10    | 286 | 20     | 65                 | 21     |
|                                                                          | 1007             | No         | .   | 9895                            | 762   | 6360  | 94.02                    | 73            | 5     | 169 | 14     | 58                 | 10     |
|                                                                          | 1015             | Yes        | .   | 219                             | 5     | 583   | 2.43                     | 72            | 72*** | 97  | 176    | 24                 | 24***  |
|                                                                          | 1018             | Yes        | Yes | 12051                           | 247   | 7404  | 58.72                    | 196           | 30    | 192 | 116    | 46                 | 34     |
|                                                                          | 1019             | Yes        | No  | 12042                           | 118   | 5699  | 69.97                    | 113           | 103   | 334 | 151    | 64                 | 64***  |
|                                                                          | 1020             | Yes        | .   | 20824                           | 249   | 6881  | 47.59                    | 169           | 4     | 278 | 7      | 82                 | 4      |
|                                                                          | 1025             | Yes        | Yes | 38363                           | 198   | 25625 | 83.31                    | 62            | 10    | 68  | 7      | 21                 | 9      |
|                                                                          | 1026             | Yes        | Yes | 2578                            | 75    | 1881  | 36.31                    | 60            | 8     | 65  | 34     | 10                 | 8      |
|                                                                          | 1032             | Yes        | Yes | 10741                           | 251   | 5765  | 77.17                    | 108           | 3     | 247 | 8      | 70                 | 5      |
|                                                                          | 1034             | Yes        | Yes | 8262                            | 8263  | 3237  | 66.83                    | 54            | 3     | 267 | 10     | 37                 | 5      |
|                                                                          | Median           |            |     | 10318                           | 158   | 6063  | 62.78                    | 73            | 9     | 181 | 27     | 42                 | 14     |
|                                                                          | Geometric Mean** |            |     | 5971                            | 136   | 5505  | .                        | .             | 10    | 158 | 31     | 32                 | 14     |
| Group 2:<br>5 doses<br>of<br>$2.7 \times 10^5$<br>PfSPZ<br>(7G8<br>CHMI) | 1010             | Yes        | No  | 18889                           | 226   | 13212 | 78.28                    | 36            | 8     | 57  | 10     | 11                 | 11     |
|                                                                          | 1012             | Yes        | No  | 13326                           | 231   | 7429  | 73.40                    | 149           | 16    | 229 | 83     | 46                 | 17     |
|                                                                          | 1014             | .          | .   | 3422                            | 99    | 2292  | 71.33                    | 18            | 5     | 54  | 2      | 13                 | 2      |
|                                                                          | 1023             | Yes        | Yes | 14243                           | 1188  | 12402 | 65.74                    | 0             | 1     | 90  | 9      | 10                 | 5      |
|                                                                          | 1024             | Yes        | No  | 21045                           | 490   | 9733  | 75.09                    | 64            | 7     | 137 | 22     | 41                 | 80     |
|                                                                          | 1030             | No         | No  | 12486                           | 1562  | 19914 | 81.28                    | 109           | 14    | 142 | 134    | 35                 | 36***  |
|                                                                          | 1009*            | .          | No  | .                               | .     | .     | .                        | .             | .     | .   | .      | .                  | .      |
|                                                                          | 1011             | .          | .   | .                               | .     | .     | .                        | .             | .     | .   | .      | .                  | .      |
|                                                                          | 1013             | .          | .   | .                               | .     | .     | .                        | .             | .     | .   | .      | .                  | .      |
|                                                                          | 1016             | .          | No  | 8963                            | 73    | 8903  | 53.51                    | 11            | 11    | 38  | 69     | 5                  | 11     |
|                                                                          | 1017             | .          | No  | 399                             | 3**** | 570   | 16.21                    | 37            | 28    | 58  | 53     | 14                 | 26     |
|                                                                          | 1022             | .          | No  | 3809                            | 3810  | 5806  | 53.86                    | 0             | 1     | 27  | 33     | 0                  | 1      |
|                                                                          | 1027             | .          | .   | 16546                           | 20    | 11341 | 84.15                    | 10            | 8     | 37  | 35     | 6                  | 6***   |
|                                                                          | 1028             | .          | .   | 11617                           | 1937  | 9269  | 74.71                    | 38            | 7     | 57  | 8      | 20                 | 38     |
|                                                                          | 1029             | .          | No  | 5453                            | 29    | 2773  | 80.47                    | 8             | 2     | 72  | 8      | 3                  | 2      |
|                                                                          | 1033             | .          | No  | 25333                           | 3168  | 6093  | 88.77                    | 194           | 8     | 285 | 25     | 84                 | 29     |
|                                                                          | Median           |            |     | 12486                           | 231   | 8903  | 74.71                    | 36            | 8     | 58  | 25     | 13                 | 11     |
|                                                                          | Geometric Mean** |            |     | 8476                            | 249   | 6368  | 64.66                    | .             | 6     | 77  | 22     | .                  | 11     |
| Group 3:<br>3 doses<br>of<br>$4.5 \times 10^5$<br>PfSPZ<br>(3D7<br>CHMI) | 1031             | Yes        | Yes | 31283                           | 293   | 8243  | 84.91                    | 172           | 14    | 278 | 29     | 83                 | 51     |
|                                                                          | 1035             | Yes        | No  | 14005                           | 68    | 6415  | 83.93                    | 65            | 17    | 156 | 282    | 43                 | 43***  |
|                                                                          | 1036             | Yes        | Yes | 32759                           | 391   | 13543 | 71.96                    | 169           | 9     | 195 | 9      | 41                 | 6      |
|                                                                          | 1037             | Yes        | No  | 7551                            | 211   | 5999  | 63.51                    | 12            | 2     | 68  | 10     | 8                  | 6      |
|                                                                          | 1038             | Yes        | No  | 17026                           | 124   | 9742  | 71.59                    | 8             | 2     | 61  | 10     | 14                 | 26     |
|                                                                          | 1039             | Yes        | Yes | 10272                           | 264   | 12018 | 66.72                    | -4            | 1     | 59  | 15     | 2                  | 5      |
|                                                                          | 1040             | Yes        | No  | 10480                           | 257   | 9296  | 80.87                    | 91            | 48    | 116 | 10     | 30                 | 23     |
|                                                                          | 1041             | No         | Yes | 2732                            | 17    | 5912  | 81.77                    | 7             | 4     | 55  | 14     | 1                  | 4      |
|                                                                          | 1042             | Yes        | No  | 15711                           | 394   | 9366  | 89.02                    | 6             | 2     | 44  | 12     | 7                  | 5      |
|                                                                          | 1043             | Yes        | Yes | 41405                           | 171   | 15134 | 74.58                    | 58            | 4     | 189 | 22     | 43                 | 18     |
|                                                                          | 1045             | Yes        | No  | 6906                            | 6     | 4822  | 84.11                    | 8             | 4     | 113 | 69     | 9                  | 9***   |
|                                                                          | 1046             | Yes        | Yes | 24713                           | 853   | 12948 | 87.97                    | 34            | 8     | 143 | 44     | 19                 | 15     |
|                                                                          | 1047             | Yes        | Yes | 26696                           | 723   | 18756 | 84.45                    | 6             | 12    | 44  | 9      | 7                  | 7***   |
|                                                                          | 1048             | No         | .   | 3496                            | 30    | 7558  | 41.89                    | 9             | 1     | 60  | 6      | 10                 | 3      |
|                                                                          | 1049             | Yes        | Yes | 34457                           | 734   | 28489 | 74.09                    | 127           | 9     | 266 | 16     | 42                 | 26     |
|                                                                          | Median           |            |     | 15711                           | 257   | 9366  | 80.87                    | 12            | 4     | 113 | 14     | 14                 | 9      |
|                                                                          | Geometric Mean** |            |     | 14206                           | 161   | 9992  | 74.96                    | .             | 5     | 101 | 19     | 14                 | 11     |

\*These subjects did not receive the full dosage according to their respective group.

\*\*Geometric mean was only calculated when the data set included only positive numbers.

\*\*\*Since the denominator was zero, this number was calculated by changing the denominator to 1.

\*\*\*\*This value, unrounded, was 2.7, rendering this volunteer negative for seroconversion.

C.

| PfSPZ/<br>Dose                                                          | ID               | Protection |     | 23 weeks post final immunization |       |       |                       |               |       |     |       |                    |       |
|-------------------------------------------------------------------------|------------------|------------|-----|----------------------------------|-------|-------|-----------------------|---------------|-------|-----|-------|--------------------|-------|
|                                                                         |                  | CHMI       |     | PfCSP OD 1.0                     |       | aIFA  | ISI<br>(% inhibition) | IFN- $\gamma$ |       | IL2 |       | IFN- $\gamma$ /IL2 |       |
|                                                                         |                  | 1          | 2   | Net                              | Ratio |       |                       | Net           | Ratio | Net | Ratio | Net                | Ratio |
| Group 1:<br>5 doses of<br>2.7x10 <sup>5</sup><br>PfSPZ<br>(3D7<br>CHMI) | 1001             | Yes        | Yes | 1309                             | 11    | 14878 | 21.75                 | -14           | <1    | 11  | 11*** | 1                  | 1***  |
|                                                                         | 1002             | Yes        | No  | 9472                             | 317   | 24630 | 64.28                 | 105           | 17    | 114 | 33    | 52                 | 52*** |
|                                                                         | 1004             | Yes        | No  | 869                              | 26    | 2738  | 58.66                 | 1             | 2     | 31  | 17    | 1                  | 1***  |
|                                                                         | 1005             | Yes        | Yes | 473                              | 9     | 2189  | 0                     | -6            | <1    | 11  | 3     | -1                 | 1     |
|                                                                         | 1006*            | No         | No  | 7682                             | 37    | 48503 | 84.4                  | -8            | 1     | 7   | 1     | -1                 | 1     |
|                                                                         | 1007             | No         | .   | .                                | .     | .     | .                     | .             | .     | .   | .     | .                  | .     |
|                                                                         | 1015             | Yes        | .   | .                                | .     | .     | .                     | .             | .     | .   | .     | .                  | .     |
|                                                                         | 1018             | Yes        | Yes | 2332                             | 49    | 4168  | 81.65                 | 14            | 5     | 32  | 20    | 8                  | 7     |
|                                                                         | 1019             | Yes        | No  | 1035                             | 11    | 2582  | 0                     | 4             | 5     | 10  | 6     | 3                  | 3***  |
|                                                                         | 1020             | Yes        | .   | .                                | .     | .     | .                     | .             | .     | .   | .     | .                  | .     |
|                                                                         | 1025             | Yes        | Yes | 14010                            | 73    | 68191 | 89.67                 | 1             | 1     | 0   | 1     | -1                 | 2     |
|                                                                         | 1026             | Yes        | Yes | 1061                             | 31    | 8320  | 22.4                  | 2             | 1     | 21  | 12    | 1                  | 3     |
|                                                                         | 1032             | Yes        | Yes | 3514                             | 83    | 2624  | 69.22                 | -18           | 1     | 44  | 2     | 3                  | 22    |
|                                                                         | 1034             | Yes        | Yes | 1694                             | 1695  | 2557  | 54.87                 | -28           | <1    | -16 | 0     | -6                 | 2     |
|                                                                         | Median           |            |     | 1694                             | 37    | 4168  | 58.66                 | 1             | 1     | 11  | 6     | 1                  | 2     |
|                                                                         | Geometric Mean** |            |     | 2273                             | 50    | 7522  | .                     | .             | .     | .   | .     | .                  | 3     |
| Group 2:<br>5 doses of<br>2.7x10 <sup>5</sup><br>PfSPZ<br>(7G8<br>CHMI) | 1010             | Yes        | No  | 3470                             | 42    | 4453  | 58.93                 | 0             | 1     | 7   | 2     | 0                  | 1     |
|                                                                         | 1012             | Yes        | No  | 3940                             | 69    | 2834  | 60.1                  | 9             | 2     | 9   | 4     | 0                  | 1     |
|                                                                         | 1014             | .          | .   | 599                              | 18    | 1715  | 52.16                 | -3            | <1    | .   | 17    | 1                  | 1***  |
|                                                                         | 1023             | YES.       | Yes | 7088                             | 592   | 11939 | 81.58                 | -41           | <1    | -13 | 1     | -5                 | <1    |
|                                                                         | 1024             | Yes        | No  | 4177                             | 98    | 5679  | 71.67                 | -3            | 1     | 5   | 1     | -1                 | 1     |
|                                                                         | 1030             | No         | No  | 7384                             | 924   | 26519 | 77.98                 | 20            | 3     | 6   | 2     | 1                  | 2     |
|                                                                         | 1009*            | .          | No  | 1048                             | 4     | 1336  | 18.97                 | 24            | 4     | 18  | 9     | 11                 | 11    |
|                                                                         | 1011             | .          | .   | .                                | .     | .     | .                     | .             | .     | .   | .     | .                  | .     |
|                                                                         | 1013             | .          | .   | 1668                             | 140   | 8238  | 47.68                 | 15            | 8     | 26  | 25    | 7                  | 7***  |
|                                                                         | 1016             | .          | No  | 1236                             | 11    | 1248  | 57.09                 | -1            | <1    | 1   | 2     | -1                 | <1    |
|                                                                         | 1017             | .          | No  | 314                              | 2     | 253   | 28.28                 | 4             | 4     | 11  | 10    | 0                  | 1     |
|                                                                         | 1022             | .          | No  | 1645                             | 1646  | 1068  | 50.5                  | -1            | 1     | 0   | <1    | 0                  | 1     |
|                                                                         | 1027             | .          | .   | .                                | .     | .     | .                     | .             | .     | .   | .     | .                  | .     |
|                                                                         | 1028             | .          | .   | .                                | .     | .     | .                     | .             | .     | .   | .     | .                  | .     |
|                                                                         | 1029             | .          | No  | 1921                             | 11    | 3350  | 62.39                 | -1            | 1     | 10  | 2     | -1                 | 1     |
|                                                                         | 1033             | .          | No  | 8379                             | 1048  | .     | 67.37                 | 3             | 1     | 29  | 4     | 1                  | 1     |
|                                                                         | Median           |            |     | 1921                             | 69    | 3092  | 58.93                 | 0             | 1     | 8   | 2     | 0                  | 1     |
|                                                                         | Geometric Mean** |            |     | 2222                             | 68    | 2976  | 53.01                 | .             | .     | .   | .     | .                  | .     |
| Group 3:<br>3 doses of<br>4.5x10 <sup>5</sup><br>PfSPZ<br>(3D7<br>CHMI) | 1031             | Yes        | Yes | 22399                            | 210   | 70064 | 96.01                 | 13            | 2     | 44  | 5     | 4                  | 4     |
|                                                                         | 1035             | Yes        | No  | 6107                             | 30    | 4915  | 81.27                 | 3             | 2     | 34  | 62    | 4                  | 4***  |
|                                                                         | 1036             | Yes        | Yes | 15274                            | 183   | 7064  | 55.83                 | .             | .     | .   | .     | .                  | .     |
|                                                                         | 1037             | Yes        | No  | 2571                             | 72    | 1423  | 52.91                 | -1            | 1     | 9   | 2     | 1                  | 1     |
|                                                                         | 1038             | Yes        | No  | 8817                             | 65    | 3863  | 70.19                 | -8            | 1     | 9   | 2     | 2                  | 5     |
|                                                                         | 1039             | Yes        | Yes | 1423                             | 37    | 1175  | 60.95                 | -5            | 1     | 21  | 6     | 4                  | 8     |
|                                                                         | 1040             | Yes        | No  | 5128                             | 126   | 5396  | 57.4                  | 12            | 7     | 19  | 2     | 4                  | 4     |
|                                                                         | 1041             | No         | Yes | 168                              | 2     | 1609  | 0                     | -2            | <1    | 8   | 3     | 0                  | 1     |
|                                                                         | 1042             | Yes        | No  | 1920                             | 49    | 6069  | 77.53                 | 0             | 1     | 14  | 4     | -1                 | 1     |
|                                                                         | 1043             | Yes        | Yes | 5040                             | 22    | 7132  | 55.59                 | -14           | <1    | -3  | 1     | -1                 | <1    |
|                                                                         | 1045             | Yes        | No  | 7501                             | 7     | 6397  | 54.21                 | 0             | 1     | 20  | 13    | 2                  | 2***  |
|                                                                         | 1046             | Yes        | Yes | 13754                            | 475   | 10596 | 89.62                 | -1            | 1     | 23  | 8     | -1                 | <1    |
|                                                                         | 1047             | Yes        | Yes | 9930                             | 269   | 17324 | 84.45                 | 3             | 6     | 19  | 4     | 1                  | 1***  |
|                                                                         | 1048             | No         | .   | .                                | .     | .     | .                     | .             | .     | .   | .     | .                  | .     |
|                                                                         | 1049             | Yes        | Yes | 10126                            | 216   | 12355 | 62.47                 | 6             | 1     | 35  | 3     | 6                  | 5     |
|                                                                         | Median           |            |     | 6804                             | 69    | 6233  | 61.71                 | 0             | 1     | 19  | 4     | 2                  | 2     |
|                                                                         | Geometric Mean** |            |     | 4984                             | 61    | 6038  | .                     | .             | .     | .   | 4     | .                  | .     |

\*These subjects did not receive the full dosage according to their respective group.

\*\*Geometric mean was only calculated when the data set included only positive numbers.

\*\*\*Since the denominator was zero, this number was calculated by changing the denominator to 1.



d.

| PfSPZ/<br>Dose            | ID            | Protection |    | Prepatent Period (days) |              |             |              | Parasite Density (parasites/ $\mu$ L) |                   |                   |                   |                   |                   |
|---------------------------|---------------|------------|----|-------------------------|--------------|-------------|--------------|---------------------------------------|-------------------|-------------------|-------------------|-------------------|-------------------|
|                           |               | CHMI       |    | CHMI 1                  |              | CHMI 2      |              | CHMI 1                                |                   |                   | CHMI 2            |                   |                   |
|                           |               | 1          | 2  | PCR                     | TBS          | PCR         | TBS          | By PCR<br>at PCR+                     | By PCR<br>at TBS+ | By TBS at<br>TBS+ | By PCR<br>at PCR+ | By PCR<br>at TBS+ | By TBS<br>at TBS+ |
| Controls<br>(3D7<br>CHMI) | 1050          | No         | .  | 6.99                    | 10.97        | .           | .            | 0.26                                  | 136.14            | 51.95             | .                 | .                 | .                 |
|                           | 1052          | No         | .  | 8.81                    | 12.25        | .           | .            | 2.84                                  | 234.56            | 34.63             | .                 | .                 | .                 |
|                           | 1056          | No         | .  | 8.90                    | 13.70        | .           | .            | 1.11                                  | 298.33            | 43.29             | .                 | .                 | .                 |
|                           | 1058          | No         | .  | 6.91                    | 10.95        | .           | .            | 0.23                                  | 166.99            | 69.26             | .                 | .                 | .                 |
|                           | 1061          | No         | .  | 9.28                    | 13.03        | .           | .            | 0.95                                  | 102.79            | 54.55             | .                 | .                 | .                 |
|                           | 1063          | No         | .  | 8.85                    | 10.93        | .           | .            | 0.14                                  | 25.22             | 3.25              | .                 | .                 | .                 |
|                           | 1065          | .          | No | .                       | .            | 7.11        | 10.92        | .                                     | .                 | .                 | 3.37              | 145.96            | 36.4              |
|                           | 1067          | .          | No | .                       | .            | 7.05        | 11.92        | .                                     | .                 | .                 | 0.49              | 431.42            | 72.7              |
|                           | 1071          | .          | No | .                       | .            | 9.00        | 12.84        | .                                     | .                 | .                 | 1.56              | 129.81            | 56.3              |
|                           | 1072          | .          | No | .                       | .            | 7.00        | 10.98        | .                                     | .                 | .                 | 0.33              | 116.97            | 26.0              |
|                           | 1073          | .          | No | .                       | .            | 6.95        | 11.23        | .                                     | .                 | .                 | 0.54              | 37.15             | 8.7               |
|                           | 1075          | .          | No | .                       | .            | 10.97       | 14.03        | .                                     | .                 | .                 | 1.50              | 145.91            | 13.0              |
|                           | <b>Median</b> |            |    | <b>8.83</b>             | <b>11.61</b> | <b>7.08</b> | <b>11.57</b> |                                       |                   |                   |                   |                   |                   |
| Controls<br>(7G8<br>CHMI) | 1051          | No         | .  | 6.76                    | 9.76         | .           | .            | 1.69                                  | 53.16             | 54.55             | .                 | .                 | .                 |
|                           | 1054          | No         | .  | 6.92                    | 12.82        | .           | .            | 2.47                                  | 170.67            | 47.62             | .                 | .                 | .                 |
|                           | 1055          | No         | .  | 8.99                    | 10.99        | .           | .            | 4.85                                  | 25.78             | 36.36             | .                 | .                 | .                 |
|                           | 1060          | No         | .  | 10.74                   | 12.87        | .           | .            | 13.78                                 | 103.71            | 17.32             | .                 | .                 | .                 |
|                           | 1064          | .          | No | .                       | .            | 7.95        | 11.74        | .                                     | .                 | .                 | 5.61              | 17,074.05         | 10,757.6          |
|                           | 1066          | .          | No | .                       | .            | 6.86        | 9.81         | .                                     | .                 | .                 | 7.80              | 346.07            | 72.7              |
|                           | 1068          | .          | No | .                       | .            | 6.91        | 10.87        | .                                     | .                 | .                 | 0.75              | 25.15             | 8.7               |
|                           | 1069          | .          | No | .                       | .            | 6.93        | 10.91        | .                                     | .                 | .                 | 2.12              | 446.48            | 54.5              |
|                           | 1070          | .          | No | .                       | .            | 7.07        | 9.93         | .                                     | .                 | .                 | 0.93              | 241.17            | 13.0              |
|                           | 1074          | .          | No | .                       | .            | 6.96        | 10.90        | .                                     | .                 | .                 | 1.09              | 138.77            | 36.4              |
|                           | <b>Median</b> |            |    | <b>7.95</b>             | <b>11.90</b> | <b>6.95</b> | <b>10.88</b> |                                       |                   |                   |                   |                   |                   |

**Table S5. Inhibition of antibodies to rPfCSP and (NANP)<sub>6</sub> by (NANP)<sub>6</sub>.** We assessed antibodies to rPfCSP and (NANP)<sub>6</sub> by ELISA in sera taken 2 weeks after the third dose of PfSPZ Vaccine from 14 subjects in Group 3 who underwent CHMI #1. We then incubated the sera with 500 ng (NANP)<sub>6</sub> for 120 minutes and reassessed the sera in the same ELISA. The same concentration of (NANP)<sub>6</sub> blocked 80% of the binding to (NANP)<sub>6</sub> and 60-62% of the binding to the nearly full-length recombinant PfCSP. Approximately 77% of the antibodies to rPfCSP were directed against the central repeat region peptide (NANP)<sub>6</sub>.

| <b>Volunteer ID</b> | <b>OD 1.0 rPfCSP Pre-Absorption</b> | <b>OD 1.0 (NANP)<sub>6</sub> Pre-Absorption</b> | <b>OD 1.0 rPfCSP Post- Absorption</b> | <b>OD 1.0 (NANP)<sub>6</sub> Post- Absorption</b> |
|---------------------|-------------------------------------|-------------------------------------------------|---------------------------------------|---------------------------------------------------|
| 2080-1031           | 35,990                              | 18,242                                          | 13588                                 | 3935                                              |
| 2080-1035           | 17,846                              | 7,910                                           | 6318                                  | 1398                                              |
| 2080-1036           | 41,638                              | 20,285                                          | 16027                                 | 1449                                              |
| 2080-1037           | 10,926                              | 4,241                                           | 3588                                  | 805                                               |
| 2080-1038           | 18,616                              | 10,550                                          | 7216                                  | 2,234                                             |
| 2080-1039           | 10,792                              | 6,467                                           | 3846                                  | 1,526                                             |
| 2080-1040           | 10,075                              | 4,463                                           | 4302                                  | 1,253                                             |
| 2080-1041           | 2,575                               | 1,082                                           | 1097                                  | 314                                               |
| 2080-1042           | 13,314                              | 4,854                                           | 5764                                  | 1,110                                             |
| 2080-1045           | 8,413                               | 2,032                                           | 4658                                  | 544                                               |
| 2080-1046           | 32,372                              | 9,143                                           | 10892                                 | 1,842                                             |
| 2080-1047           | 24,689                              | 12,218                                          | 8819                                  | 2,708                                             |
| 2080-1048           | 3,524                               | 1,320                                           | 1657                                  | 324                                               |
| 2080-1049           | 39,612                              | 17,740                                          | 14871                                 | 4,112                                             |
| <b>Mean</b>         | <b>19,313</b>                       | <b>8,610</b>                                    | <b>7,332 (-62%)</b>                   | <b>1,682 (-80%)</b>                               |

**Table S6. Antibodies to well-defined Pf proteins 2 weeks after the last dose of PfSPZ Vaccine**

| Protein                                               | Group                                                         |                                       |                                                |                                                               |                                       |                                                |                                                               |                                       |                                                |
|-------------------------------------------------------|---------------------------------------------------------------|---------------------------------------|------------------------------------------------|---------------------------------------------------------------|---------------------------------------|------------------------------------------------|---------------------------------------------------------------|---------------------------------------|------------------------------------------------|
|                                                       | Group 1 (5 doses of $2.7 \times 10^5$ PfSPZ, CHMI with Pf3D7) |                                       |                                                | Group 2 (5 doses of $2.7 \times 10^5$ PfSPZ, CHMI with Pf7G8) |                                       |                                                | Group 3 (3 doses of $4.5 \times 10^5$ PfSPZ, CHMI with Pf3D7) |                                       |                                                |
|                                                       | No. Positive<br>*<br>/No. Tested<br>(%)                       | Net OD<br>1.0 of<br>Positives<br>(GM) | Net OD<br>1.0 Ratio<br>of<br>Positives<br>(GM) | No. Positive<br>/No. Tested<br>(%)                            | Net OD<br>1.0 of<br>Positives<br>(GM) | Net OD<br>1.0 Ratio<br>of<br>Positives<br>(GM) | No. Positive<br>/No. Tested<br>(%)                            | Net OD<br>1.0 of<br>Positives<br>(GM) | Net OD<br>1.0 Ratio<br>of<br>Positives<br>(GM) |
| <b>1<sup>st</sup> Expressed in Sporozoites</b>        |                                                               |                                       |                                                |                                                               |                                       |                                                |                                                               |                                       |                                                |
| PfCSP                                                 | 13/14<br>(93%)                                                | 5971                                  | 135.98                                         | 12/13<br>(92%)                                                | 10,935                                | 359.50                                         | 15/15<br>(100%)                                               | 14,206                                | 161.61                                         |
| PfSSP2/<br>TRAP                                       | 5/14<br>(36%)                                                 | 232                                   | 58.55                                          | 3/13<br>(23%)                                                 | 876                                   | 160.74                                         | 2/15<br>(13%)                                                 | 175                                   | 25.76                                          |
| PfCelTOS                                              | 0/14                                                          |                                       |                                                | 0/13                                                          |                                       |                                                | 0/15                                                          |                                       |                                                |
| PfMSP5                                                | 3/14<br>(21%)                                                 | 176                                   | 5.11                                           | 7/13<br>(54%)                                                 | 317                                   | 5.61                                           | 11/15<br>(73%)                                                | 386                                   | 6.26                                           |
| PfAMA1                                                | 6/14<br>(43%)                                                 | 342                                   | 8.62                                           | 6/13<br>(46%)                                                 | 256                                   | 6.03                                           | 1/15<br>(7%)                                                  | 51**                                  | 52.00**                                        |
| <b>1<sup>st</sup> Expressed in Early Liver Stages</b> |                                                               |                                       |                                                |                                                               |                                       |                                                |                                                               |                                       |                                                |
| PfEXP1                                                | 0/14                                                          |                                       |                                                | 1/13<br>(8%)                                                  | 24*                                   | 24.00*                                         | 0/15                                                          |                                       |                                                |
| PfLSA1                                                | 0/14                                                          |                                       |                                                | 0/13                                                          |                                       |                                                | 0/15                                                          |                                       |                                                |
| <b>1<sup>st</sup> Expressed in Late Liver Stages</b>  |                                                               |                                       |                                                |                                                               |                                       |                                                |                                                               |                                       |                                                |
| PfMSP1                                                | 0/14                                                          |                                       |                                                | 0/13                                                          |                                       |                                                | 0/15                                                          |                                       |                                                |
| PfEBA175                                              | 0/14                                                          |                                       |                                                | 0/13                                                          |                                       |                                                | 0/15                                                          |                                       |                                                |

\*To be considered positive the Net OD 1.0 had to be greater than 50 and the ratio of the OD 1.0 post immunization to the OD 1.0 pre-immunization had to be >3.0.

\*\*For these values, the single value is recorded, not the geometric mean (GM).

**Table S7. Injection pain, efficiency, and speed**

|                                                            | <i>Group 1 and 2</i> | <i>Group 3</i> | <i>Total</i> |
|------------------------------------------------------------|----------------------|----------------|--------------|
| <b>Pain assessment, n (%)</b>                              |                      |                |              |
| Number of pain questionnaire responses                     | 145 (100)            | 45 (100)       | 190 (100)    |
| Immunizations with subject assessment of:                  |                      |                |              |
| No pain                                                    | 109 (75)             | 29 (64)        | 138 (73)     |
| Mild pain                                                  | 31 (21)              | 15 (33)        | 46 (24)      |
| Moderate pain                                              | 5 (3)                | 1 (2)          | 6 (3)        |
| Severe pain                                                | 0                    | 0              | 0            |
| Comparison to previous injections received <sup>a</sup>    |                      |                |              |
| Less painful                                               | 66 (46)              | 13 (29)        | 79 (42)      |
| Same                                                       | 65 (45)              | 32 (71)        | 97 (51)      |
| More painful                                               | 14 (10)              | 0              | 14 (7)       |
| <b>Injector assessment, n (%)</b>                          |                      |                |              |
| Number of stick injections per immunization                |                      |                |              |
| 1 stick                                                    | 139 (96)             | 43 (96)        | 182 (96)     |
| 2 sticks                                                   | 6 (4)                | 2(4)           | 8 (4)        |
| ≥3 sticks                                                  | 0                    | 0              | 0            |
| Unsuccessful                                               | 0                    | 0              | 0            |
| Difficulty of 1-stick injections <sup>b</sup>              |                      |                |              |
| Simple                                                     | 137/139 (99)         | 39/43(91)      | 176/182 (97) |
| Moderately difficult                                       | 2 (1)                | 4 (9)          | 6 (3)        |
| Very difficult                                             | 0                    | 0              | 0            |
| <b>Elapsed time (minutes)</b>                              |                      |                |              |
| <i>Vaccine thawing to syringe receipt by injector</i>      |                      |                |              |
| N                                                          | 145                  | 45             | 190          |
| Mean (SD)                                                  | 4.6 (1.6)            | 6.1 (1.0)      | 4.9 (1.6)    |
| Range (min, max)                                           | 3, 20                | 5, 8           | 3, 20        |
| Quartiles (25 <sup>th</sup> , median, 75 <sup>th</sup> )   | 4, 4, 5              | 5, 6, 7        | 4, 5, 6      |
| <i>Syringe receipt by injector to injection completion</i> |                      |                |              |
| N                                                          | 145                  | 45             | 190          |
| Mean (SD)                                                  | 1.3 (1.8)            | 2.0 (1.5)      | 1.5 (1.7)    |
| Range (min, max)                                           | 0, 20                | 0, 8           | 0, 20        |
| Quartiles (25 <sup>th</sup> , median, 75 <sup>th</sup> )   | 1, 1, 1              | 1, 2, 2        | 1, 1, 2      |

Column header counts and denominators are the total number of immunizations administered, unless indicated otherwise.

a Comparison is to other injections received in the subject's lifetime.

b Denominators are the number of immunizations with 1-stick injections.

**Table S8. Global summary of possibly, probably, or definitely related adverse events**

|                                                   | <i>Group 1 and 2</i><br><i>N = 30</i><br><i># imm = 5</i> | <i>Group 3</i><br><i>N = 15</i><br><i># imm = 3</i> | <i>Total</i><br><i>N = 45</i> |
|---------------------------------------------------|-----------------------------------------------------------|-----------------------------------------------------|-------------------------------|
| <b>Solicited AEs<sup>a</sup></b>                  |                                                           |                                                     |                               |
| Volunteers with at least one event, n (%)         | 16 (53)                                                   | 8 (53)                                              | 24 (53)                       |
| Volunteers with at least one Grade 3 event, n (%) | 0                                                         | 0                                                   | 0                             |
| Number of events                                  | 43                                                        | 23                                                  | 66                            |
| Mean number of events per volunteer with events   | 2.7                                                       | 2.9                                                 | 2.8                           |
| Maximum grade reported                            | 2                                                         | 2                                                   | 2                             |
| <b>Solicited local AEs<sup>a</sup></b>            |                                                           |                                                     |                               |
| Volunteers with at least one event, n (%)         | 4 (13)                                                    | 2 (13)                                              | 6 (13)                        |
| Volunteers with at least one Grade 3 event, n (%) | 0                                                         | 0                                                   | 0                             |
| Number of events                                  | 6                                                         | 5                                                   | 11                            |
| Mean number of events per volunteer with events   | 1.5                                                       | 2.5                                                 | 1.8                           |
| Maximum grade reported                            | 1                                                         | 1                                                   | 1                             |
| <b>Solicited systemic AEs<sup>a</sup></b>         |                                                           |                                                     |                               |
| Volunteers with at least one event, n (%)         | 13 (43)                                                   | 8 (53)                                              | 21 (47)                       |
| Volunteers with at least one Grade 3 event, n (%) | 0                                                         | 0                                                   | 0                             |
| Number of events                                  | 37                                                        | 18                                                  | 55                            |
| Mean number of events per volunteer with events   | 2.8                                                       | 2.3                                                 | 2.6                           |
| Maximum grade reported                            | 2                                                         | 2                                                   | 2                             |
| <b>Unsolicited AEs<sup>b</sup></b>                |                                                           |                                                     |                               |
| Volunteers with at least one event, n (%)         | 14 (47)                                                   | 4 (27)                                              | 18 (40)                       |
| Volunteers with at least one Grade 3 event, n (%) | 0                                                         | 0                                                   | 0                             |
| Number of events                                  | 18                                                        | 6                                                   | 24                            |
| Mean number of events per volunteer with events   | 1.3                                                       | 1.5                                                 | 1.3                           |
| Maximum grade reported                            | 1                                                         | 1                                                   | 1                             |
| <b>Serious AEs<sup>c</sup></b>                    |                                                           |                                                     |                               |
| Volunteers with at least one event, n (%)         | 0                                                         | 0                                                   | 0                             |
| Number of events                                  | 0                                                         | 0                                                   | 0                             |

Column header counts and denominators are the number of volunteers who received at least one immunization.

a Solicited AEs are from the day of immunization through 7 days after immunization.

b Unsolicited AEs are from the day of first immunization through the day of first CHMI or study discontinuation, whichever occurs first.

c Serious AEs are from the the day of first immunization through the day of first CHMI or study discontinuation, whichever occurs first.

**Table S9. Summary of possibly, probably, or definitely related solicited adverse events for each group, by immunization.**

|                                                      | <i>Imm 1</i> | <i>Imm 2</i> | <i>Imm 3</i> | <i>Imm 4</i> | <i>Imm 5</i> |
|------------------------------------------------------|--------------|--------------|--------------|--------------|--------------|
| <b>Group 1 and 2</b>                                 |              |              |              |              |              |
| Subjects receiving immunization                      | 30           | 30           | 29           | 29           | 27           |
| Local solicited AEs                                  |              |              |              |              |              |
| Subjects with at least one event, n (%) <sup>a</sup> | 2 (7)        | 0            | 1 (3)        | 0            | 1 (4)        |
| Number of events                                     | 3            | 0            | 2            | 0            | 1            |
| Systemic solicited AEs                               |              |              |              |              |              |
| Subjects with at least one event, n (%) <sup>a</sup> | 5 (17)       | 9 (30)       | 2 (7)        | 4 (14)       | 1 (4)        |
| Number of events                                     | 7            | 19           | 5            | 5            | 1            |
| <b>Group 3</b>                                       |              |              |              |              |              |
| Subjects receiving immunization                      | 15           | 15           | 15           | n/a          | n/a          |
| Local solicited AEs                                  |              |              |              |              |              |
| Subjects with at least one event, n (%) <sup>a</sup> | 1 (7)        | 1 (7)        | 2 (13)       |              |              |
| Number of events                                     | 1            | 2            | 2            |              |              |
| Systemic solicited AEs                               |              |              |              |              |              |
| Subjects with at least one event, n (%) <sup>a</sup> | 5 (33)       | 4 (27)       | 3 (20)       |              |              |
| Number of events                                     | 7            | 6            | 5            |              |              |

<sup>a</sup>Denominators are the number of subjects receiving the specified immunization.

**Table S10a. Possibly, probably, or definitely related solicited adverse events for each immunization, by group (all immunizations)**

|                                             | <i>Group 1 and 2</i><br><i>N=30</i><br><i># imm = 5</i> |                            | <i>Group 3</i><br><i>N=15</i><br><i># imm = 3</i> |                            | <i>Total</i><br><i>N=45</i> |                            |
|---------------------------------------------|---------------------------------------------------------|----------------------------|---------------------------------------------------|----------------------------|-----------------------------|----------------------------|
|                                             | <i>Vol</i><br><i>n (%)</i>                              | <i>Max</i><br><i>grade</i> | <i>Vol</i><br><i>n (%)</i>                        | <i>Max</i><br><i>grade</i> | <i>Vol</i><br><i>n (%)</i>  | <i>Max</i><br><i>grade</i> |
| <b>Any immunization</b>                     | <b>16/30(53)</b>                                        | <b>2</b>                   | <b>8/15(53)</b>                                   | <b>2</b>                   | <b>24/45 (53)</b>           | <b>2</b>                   |
| <b>Any local reaction at injection site</b> | <b>4(13)</b>                                            | <b>1</b>                   | <b>2(13)</b>                                      | <b>1</b>                   | <b>6(13)</b>                | <b>1</b>                   |
| Pain                                        | 2(7)                                                    | 1                          | 2(13)                                             | 1                          | 4(9)                        | 1                          |
| Tenderness                                  | 1(3)                                                    | 1                          | 1(7)                                              | 1                          | 2(4)                        | 1                          |
| Erythema                                    | 1(3)                                                    | 1                          | 0(0)                                              |                            | 1(2)                        | 1                          |
| Induration                                  | 1(3)                                                    | 1                          | 0(0)                                              |                            | 1(2)                        | 1                          |
| Swelling                                    | 0(0)                                                    |                            | 1(7)                                              | 1                          | 1(2)                        | 1                          |
| <b>Any systemic reaction</b>                | <b>13(43)</b>                                           | <b>2</b>                   | <b>8(53)</b>                                      | <b>2</b>                   | <b>21(47)</b>               | <b>2</b>                   |
| Headache                                    | 10(33)                                                  | 1                          | 7(47)                                             | 2                          | 17(38)                      | 2                          |
| Fatigue                                     | 4(13)                                                   | 1                          | 3(20)                                             | 2                          | 7(16)                       | 2                          |
| Malaise                                     | 5(17)                                                   | 1                          | 0(0)                                              |                            | 5(11)                       | 1                          |
| Myalgia                                     | 3(10)                                                   | 1                          | 1(7)                                              | 1                          | 4(9)                        | 1                          |
| Arthralgia                                  | 3(10)                                                   | 2                          | 0(0)                                              |                            | 3(7)                        | 2                          |
| Chills                                      | 1(3)                                                    | 1                          | 1(7)                                              | 1                          | 2(4)                        | 1                          |
| Nausea                                      | 1(3)                                                    | 1                          | 1(7)                                              | 1                          | 2(4)                        | 1                          |
| Diarrhoea                                   | 1(3)                                                    | 1                          | 0(0)                                              |                            | 1(2)                        | 1                          |
| Allergic reaction                           | 0                                                       |                            | 0                                                 |                            | 0                           |                            |
| Pyrexia                                     | 0                                                       |                            | 0                                                 |                            | 0                           |                            |
| Vomiting                                    | 0                                                       |                            | 0                                                 |                            | 0                           |                            |

Column header counts are the number of subjects receiving at least one immunization. Denominators are the number of subjects receiving the specified immunization. Max grade is the maximum grade experienced by a subject for the specified event and immunization.

**Table S10b. Possibly, probably, or definitely related solicited adverse events for each immunization, by group (Immunization 1).**

|                                             | <i>Group 1 and 2</i><br><i>N=30</i><br><i># imm = 5</i> |                            | <i>Group 3</i><br><i>N=15</i><br><i># imm = 3</i> |                            | <i>Total</i><br><i>N=45</i> |                            |
|---------------------------------------------|---------------------------------------------------------|----------------------------|---------------------------------------------------|----------------------------|-----------------------------|----------------------------|
|                                             | <i>Vol</i><br><i>n (%)</i>                              | <i>Max</i><br><i>grade</i> | <i>Vol</i><br><i>n (%)</i>                        | <i>Max</i><br><i>grade</i> | <i>Vol</i><br><i>n (%)</i>  | <i>Max</i><br><i>grade</i> |
| <b>Immunization 1</b>                       | <b>7/30(23)</b>                                         | <b>1</b>                   | <b>6/15(40)</b>                                   | <b>2</b>                   | <b>13/45(29)</b>            | <b>2</b>                   |
| <b>Any local reaction at injection site</b> | <b>2(7)</b>                                             | <b>1</b>                   | <b>1(7)</b>                                       | <b>1</b>                   | <b>3(7)</b>                 | <b>1</b>                   |
| Tenderness                                  | 1(3)                                                    | 1                          | 1(7)                                              | 1                          | 2(4)                        | 1                          |
| Erythema                                    | 1(3)                                                    | 1                          | 0(0)                                              |                            | 1(2)                        | 1                          |
| Induration                                  | 1(3)                                                    | 1                          | 0(0)                                              |                            | 1(2)                        | 1                          |
| Pain                                        | 0                                                       |                            | 0                                                 |                            | 0                           |                            |
| Swelling                                    | 0                                                       |                            | 0                                                 |                            | 0                           |                            |
| <b>Any systemic reaction</b>                | <b>5(17)</b>                                            | <b>1</b>                   | <b>5(33)</b>                                      | <b>2</b>                   | <b>10(22)</b>               | <b>2</b>                   |
| Headache                                    | 4(13)                                                   | 1                          | 5(33)                                             | 1                          | 9(20)                       | 1                          |
| Chills                                      | 1(3)                                                    | 1                          | 1(7)                                              | 1                          | 2(4)                        | 1                          |
| Fatigue                                     | 0(0)                                                    |                            | 1(7)                                              | 2                          | 1(2)                        | 2                          |
| Malaise                                     | 1(3)                                                    | 1                          | 0(0)                                              |                            | 1(2)                        | 1                          |
| Myalgia                                     | 1(3)                                                    | 1                          | 0(0)                                              |                            | 1(2)                        | 1                          |
| Allergic reaction                           | 0                                                       |                            | 0                                                 |                            | 0                           |                            |
| Arthralgia                                  | 0                                                       |                            | 0                                                 |                            | 0                           |                            |
| Diarrhoea                                   | 0                                                       |                            | 0                                                 |                            | 0                           |                            |
| Nausea                                      | 0                                                       |                            | 0                                                 |                            | 0                           |                            |
| Pyrexia                                     | 0                                                       |                            | 0                                                 |                            | 0                           |                            |
| Vomiting                                    | 0                                                       |                            | 0                                                 |                            | 0                           |                            |

Column header counts are the number of subjects receiving at least one immunization. Denominators are the number of subjects receiving the specified immunization. Max grade is the maximum grade experienced by a subject for the specified event and immunization.



**Table S10c. Possibly, probably, or definitely related solicited adverse events for each immunization, by group (Immunization 2).**

|                                             | <i>Group 1 and 2</i><br><i>N=30</i><br><i># imm = 5</i> |                            | <i>Group 3</i><br><i>N=15</i><br><i># imm = 3</i> |                            | <i>Total</i><br><i>N=45</i> |                            |
|---------------------------------------------|---------------------------------------------------------|----------------------------|---------------------------------------------------|----------------------------|-----------------------------|----------------------------|
|                                             | <i>Vol</i><br><i>n (%)</i>                              | <i>Max</i><br><i>grade</i> | <i>Vol</i><br><i>n (%)</i>                        | <i>Max</i><br><i>grade</i> | <i>Vol</i><br><i>n (%)</i>  | <i>Max</i><br><i>grade</i> |
| <b>Immunization 2</b>                       | <b>9/30(30)</b>                                         | <b>2</b>                   | <b>4/15(27)</b>                                   | <b>2</b>                   | <b>13/45(29)</b>            | <b>2</b>                   |
| <b>Any local reaction at injection site</b> | <b>0(0)</b>                                             |                            | <b>1(7)</b>                                       | <b>1</b>                   | <b>1(2)</b>                 | <b>1</b>                   |
| Pain                                        | 0(0)                                                    |                            | 1(7)                                              | 1                          | 1(2)                        | 1                          |
| Swelling                                    | 0(0)                                                    |                            | 1(7)                                              | 1                          | 1(2)                        | 1                          |
| Erythema                                    | 0                                                       |                            | 0                                                 |                            | 0                           |                            |
| Induration                                  | 0                                                       |                            | 0                                                 |                            | 0                           |                            |
| Tenderness                                  | 0                                                       |                            | 0                                                 |                            | 0                           |                            |
| <b>Any systemic reaction</b>                | <b>9(30)</b>                                            | <b>2</b>                   | <b>4(27)</b>                                      | <b>2</b>                   | <b>13(29)</b>               | <b>2</b>                   |
| Headache                                    | 6(20)                                                   | 1                          | 3(20)                                             | 2                          | 9(20)                       | 2                          |
| Fatigue                                     | 4(13)                                                   | 1                          | 1(7)                                              | 1                          | 5(11)                       | 1                          |
| Malaise                                     | 3(10)                                                   | 1                          | 0(0)                                              |                            | 3(7)                        | 1                          |
| Arthralgia                                  | 2(7)                                                    | 2                          | 0(0)                                              |                            | 2(4)                        | 2                          |
| Myalgia                                     | 2(7)                                                    | 1                          | 0(0)                                              |                            | 2(4)                        | 1                          |
| Nausea                                      | 1(3)                                                    | 1                          | 1(7)                                              | 1                          | 2(4)                        | 1                          |
| Allergic reaction                           | 0                                                       |                            | 0                                                 |                            | 0                           |                            |
| Chills                                      | 0                                                       |                            | 0                                                 |                            | 0                           |                            |
| Diarrhoea                                   | 0                                                       |                            | 0                                                 |                            | 0                           |                            |
| Pyrexia                                     | 0                                                       |                            | 0                                                 |                            | 0                           |                            |
| Vomiting                                    | 0                                                       |                            | 0                                                 |                            | 0                           |                            |

Column header counts are the number of subjects receiving at least one immunization. Denominators are the number of subjects receiving the specified immunization. Max grade is the maximum grade experienced by a subject for the specified event and immunization.

**Table S10d. Possibly, probably, or definitely related solicited adverse events for each immunization, by group (Immunization 3).**

|                                             | <i>Group 1 and 2</i> |              | <i>Group 3</i>   |              | <i>Total</i>    |              |
|---------------------------------------------|----------------------|--------------|------------------|--------------|-----------------|--------------|
|                                             | <i>N=30</i>          |              | <i>N=15</i>      |              | <i>N=45</i>     |              |
|                                             | <i># imm = 5</i>     |              | <i># imm = 3</i> |              |                 |              |
|                                             | <i>Vol</i>           | <i>Max</i>   | <i>Vol</i>       | <i>Max</i>   | <i>Vol</i>      | <i>Max</i>   |
|                                             | <i>n (%)</i>         | <i>grade</i> | <i>n (%)</i>     | <i>grade</i> | <i>n (%)</i>    | <i>grade</i> |
| <b>Immunization 3</b>                       | <b>3/29(10)</b>      | <b>1</b>     | <b>4/15(27)</b>  | <b>2</b>     | <b>7/44(16)</b> | <b>2</b>     |
| <b>Any local reaction at injection site</b> | <b>1(3)</b>          | <b>1</b>     | <b>2(13)</b>     | <b>1</b>     | <b>3(7)</b>     | <b>1</b>     |
| Pain                                        | 1(3)                 | 1            | 2(13)            | 1            | 3(7)            | 1            |
| Erythema                                    | 0                    |              | 0                |              | 0               |              |
| Induration                                  | 0                    |              | 0                |              | 0               |              |
| Swelling                                    | 0                    |              | 0                |              | 0               |              |
| Tenderness                                  | 0                    |              | 0                |              | 0               |              |
| <b>Any systemic reaction</b>                | <b>2(7)</b>          | <b>1</b>     | <b>3(20)</b>     | <b>2</b>     | <b>5(11)</b>    | <b>2</b>     |
| Headache                                    | 1(3)                 | 1            | 3(20)            | 2            | 4(9)            | 2            |
| Fatigue                                     | 1(3)                 | 1            | 1(7)             | 1            | 2(5)            | 1            |
| Malaise                                     | 2(7)                 | 1            | 0(0)             |              | 2(5)            | 1            |
| Diarrhoea                                   | 1(3)                 | 1            | 0(0)             |              | 1(2)            | 1            |
| Myalgia                                     | 0(0)                 |              | 1(7)             | 1            | 1(2)            | 1            |
| Allergic reaction                           | 0                    |              | 0                |              | 0               |              |
| Arthralgia                                  | 0                    |              | 0                |              | 0               |              |
| Chills                                      | 0                    |              | 0                |              | 0               |              |
| Nausea                                      | 0                    |              | 0                |              | 0               |              |
| Pyrexia                                     | 0                    |              | 0                |              | 0               |              |
| Vomiting                                    | 0                    |              | 0                |              | 0               |              |

Column header counts are the number of subjects receiving at least one immunization. Denominators are the number of subjects receiving the specified immunization. Max grade is the maximum grade experienced by a subject for the specified event and immunization.

**Table S10e. Possibly, probably, or definitely related solicited adverse events for each immunization, by group (Immunization 4).**

|                                             | <i>Group 1 and 2</i><br><i>N=30</i><br><i># imm = 5</i> |                            | <i>Group 3</i><br><i>N=15</i><br><i># imm = 3</i> |                            | <i>Total</i><br><i>N=45</i> |                            |
|---------------------------------------------|---------------------------------------------------------|----------------------------|---------------------------------------------------|----------------------------|-----------------------------|----------------------------|
|                                             | <i>Vol</i><br><i>n (%)</i>                              | <i>Max</i><br><i>grade</i> | <i>Vol</i><br><i>n (%)</i>                        | <i>Max</i><br><i>grade</i> | <i>Vol</i><br><i>n (%)</i>  | <i>Max</i><br><i>grade</i> |
| <b>Immunization 4</b>                       | <b>4/29(14)</b>                                         | <b>1</b>                   | <b>n/a</b>                                        | <b>n/a</b>                 | <b>4/29(14)</b>             | <b>1</b>                   |
| <b>Any local reaction at injection site</b> | <b>0</b>                                                |                            |                                                   |                            | <b>0</b>                    |                            |
| Erythema                                    | 0                                                       |                            |                                                   |                            | 0                           |                            |
| Induration                                  | 0                                                       |                            |                                                   |                            | 0                           |                            |
| Pain                                        | 0                                                       |                            |                                                   |                            | 0                           |                            |
| Swelling                                    | 0                                                       |                            |                                                   |                            | 0                           |                            |
| Tenderness                                  | 0                                                       |                            |                                                   |                            | 0                           |                            |
| <b>Any systemic reaction</b>                | <b>4(14)</b>                                            | <b>1</b>                   |                                                   |                            | <b>4(14)</b>                | <b>1</b>                   |
| Headache                                    | 2(7)                                                    | 1                          |                                                   |                            | 2(7)                        | 1                          |
| Fatigue                                     | 1(3)                                                    | 1                          |                                                   |                            | 1(3)                        | 1                          |
| Malaise                                     | 1(3)                                                    | 1                          |                                                   |                            | 1(3)                        | 1                          |
| Nausea                                      | 1(3)                                                    | 1                          |                                                   |                            | 1(3)                        | 1                          |
| Allergic reaction                           | 0                                                       |                            |                                                   |                            | 0                           |                            |
| Arthralgia                                  | 0                                                       |                            |                                                   |                            | 0                           |                            |
| Chills                                      | 0                                                       |                            |                                                   |                            | 0                           |                            |
| Diarrhoea                                   | 0                                                       |                            |                                                   |                            | 0                           |                            |
| Myalgia                                     | 0                                                       |                            |                                                   |                            | 0                           |                            |
| Pyrexia                                     | 0                                                       |                            |                                                   |                            | 0                           |                            |
| Vomiting                                    | 0                                                       |                            |                                                   |                            | 0                           |                            |

Column header counts are the number of subjects receiving at least one immunization. Denominators are the number of subjects receiving the specified immunization. Max grade is the maximum grade experienced by a subject for the specified event and immunization.

**Table S10f. Possibly, probably, or definitely related solicited adverse events for each immunization, by group (Immunization 5).**

|                                             | <i>Group 1 and 2</i><br><i>N=30</i><br><i># imm = 5</i> |                            | <i>Group 3</i><br><i>N=15</i><br><i># imm = 3</i> |                            | <i>Total</i><br><i>N=45</i> |                            |
|---------------------------------------------|---------------------------------------------------------|----------------------------|---------------------------------------------------|----------------------------|-----------------------------|----------------------------|
|                                             | <i>Vol</i><br><i>n (%)</i>                              | <i>Max</i><br><i>grade</i> | <i>Vol</i><br><i>n (%)</i>                        | <i>Max</i><br><i>grade</i> | <i>Vol</i><br><i>n (%)</i>  | <i>Max</i><br><i>grade</i> |
| <b>Immunization 5</b>                       | <b>2/27(7)</b>                                          | <b>2</b>                   | <b>n/a</b>                                        | <b>n/a</b>                 | <b>2/27(7)</b>              | <b>2</b>                   |
| <b>Any local reaction at injection site</b> | <b>1(4)</b>                                             | <b>1</b>                   |                                                   |                            | <b>1(4)</b>                 | <b>1</b>                   |
| Pain                                        | 1(4)                                                    | 1                          |                                                   |                            | 1(4)                        | 1                          |
| Erythema                                    | 0                                                       |                            |                                                   |                            | 0                           |                            |
| Induration                                  | 0                                                       |                            |                                                   |                            | 0                           |                            |
| Swelling                                    | 0                                                       |                            |                                                   |                            | 0                           |                            |
| Tenderness                                  | 0                                                       |                            |                                                   |                            | 0                           |                            |
| <b>Any systemic reaction</b>                | <b>1(4)</b>                                             | <b>2</b>                   |                                                   |                            | <b>1(4)</b>                 | <b>2</b>                   |
| Arthralgia                                  | 1(4)                                                    | 2                          |                                                   |                            | 1(4)                        | 2                          |
| Allergic reaction                           | 0                                                       |                            |                                                   |                            | 0                           |                            |
| Chills                                      | 0                                                       |                            |                                                   |                            | 0                           |                            |
| Diarrhoea                                   | 0                                                       |                            |                                                   |                            | 0                           |                            |
| Fatigue                                     | 0                                                       |                            |                                                   |                            | 0                           |                            |
| Headache                                    | 0                                                       |                            |                                                   |                            | 0                           |                            |
| Malaise                                     | 0                                                       |                            |                                                   |                            | 0                           |                            |
| Myalgia                                     | 0                                                       |                            |                                                   |                            | 0                           |                            |
| Nausea                                      | 0                                                       |                            |                                                   |                            | 0                           |                            |
| Pyrexia                                     | 0                                                       |                            |                                                   |                            | 0                           |                            |
| Vomiting                                    | 0                                                       |                            |                                                   |                            | 0                           |                            |

Column header counts are the number of subjects receiving at least one immunization. Denominators are the number of subjects receiving the specified immunization. Max grade is the maximum grade experienced by a subject for the specified event and immunization.

**Table S11a – Laboratory abnormalities pre- and post-immunization**

| <i>Parameter/Grade</i> | <i>Baseline<sup>a</sup><br/>(Day of<br/>immunization 1)<br/>n/N (%)</i> | <i>Day of<br/>immunization<br/>2, 3, 4, or 5<sup>b</sup><br/>n/N (%)</i> | <i>Day 2<br/>post-imm<br/>n/N (%)</i> | <i>Day 7<br/>post-imm<br/>n/N (%)</i> | <i>Day 21<br/>post-imm<sup>c</sup><br/>n/N (%)</i> | <i>Max severity<br/>post-baseline<sup>d</sup><br/>n/N (%)</i> |
|------------------------|-------------------------------------------------------------------------|--------------------------------------------------------------------------|---------------------------------------|---------------------------------------|----------------------------------------------------|---------------------------------------------------------------|
| <b>Any parameter</b>   |                                                                         |                                                                          |                                       |                                       |                                                    |                                                               |
| Grade 0                | 35/45 (78)                                                              | 25/45 (56)                                                               | 17/45 (38)                            | 16/45 (36)                            | 28/42 (67)                                         | 11/45 (24)                                                    |
| Grade 1                | 7 (16)                                                                  | 15 (33)                                                                  | 20 (44)                               | 23 (51)                               | 10 (24)                                            | 22 (49)                                                       |
| Grade 2                | 3 (7)                                                                   | 5 (11)                                                                   | 7 (16)                                | 6 (13)                                | 4 (10)                                             | 11 (24)                                                       |
| Grade 3                | 0                                                                       | 0                                                                        | 1 (2)                                 | 0                                     | 0                                                  | 1 (2)                                                         |
| <b>ALP</b>             |                                                                         |                                                                          |                                       |                                       |                                                    |                                                               |
| Grade 0                | 45/45 (100)                                                             | 45/45 (100)                                                              | 45/45 (100)                           | 45/45 (100)                           | 41/41 (100)                                        | 45/45 (100)                                                   |
| Grade 1                | 0                                                                       | 0                                                                        | 0                                     | 0                                     | 0                                                  | 0                                                             |
| Grade 2                | 0                                                                       | 0                                                                        | 0                                     | 0                                     | 0                                                  | 0                                                             |
| Grade 3                | 0                                                                       | 0                                                                        | 0                                     | 0                                     | 0                                                  | 0                                                             |
| <b>ALT</b>             |                                                                         |                                                                          |                                       |                                       |                                                    |                                                               |
| Grade 0                | 44/45 (98)                                                              | 38/45 (84)                                                               | 39/45 (87)                            | 39/45 (87)                            | 40/42 (95)                                         | 35/45 (78)                                                    |
| Grade 1                | 1 (2)                                                                   | 7 (16)                                                                   | 5 (11)                                | 6 (13)                                | 2 (5)                                              | 9 (20)                                                        |
| Grade 2                | 0                                                                       | 0                                                                        | 1 (2)                                 | 0                                     | 0                                                  | 1 (2)                                                         |
| Grade 3                | 0                                                                       | 0                                                                        | 0                                     | 0                                     | 0                                                  | 0                                                             |
| <b>AST</b>             |                                                                         |                                                                          |                                       |                                       |                                                    |                                                               |
| Grade 0                | 45/45 (100)                                                             | 39/45 (87)                                                               | 37/45 (82)                            | 41/45 (91)                            | 41/42 (98)                                         | 32/45 (71)                                                    |
| Grade 1                | 0                                                                       | 6 (13)                                                                   | 7 (16)                                | 3 (7)                                 | 1 (2)                                              | 11 (24)                                                       |
| Grade 2                | 0                                                                       | 0                                                                        | 1 (2)                                 | 1 (2)                                 | 0                                                  | 2 (4)                                                         |
| Grade 3                | 0                                                                       | 0                                                                        | 0                                     | 0                                     | 0                                                  | 0                                                             |
| <b>Total bilirubin</b> |                                                                         |                                                                          |                                       |                                       |                                                    |                                                               |
| Grade 0                | 43/45 (96)                                                              | 44/45 (98)                                                               | 43/45 (96)                            | 41/45 (91)                            | 42/42 (100)                                        | 41/45 (91)                                                    |
| Grade 1                | 2 (4)                                                                   | 1 (2)                                                                    | 2 (4)                                 | 4 (9)                                 | 0                                                  | 4 (9)                                                         |
| Grade 2                | 0                                                                       | 0                                                                        | 0                                     | 0                                     | 0                                                  | 0                                                             |
| Grade 3                | 0                                                                       | 0                                                                        | 0                                     | 0                                     | 0                                                  | 0                                                             |

Subjects in Group 1 and 2 received up to five immunizations and subjects in Group 3 received up to three immunizations. Subjects are counted at most once under a column according to the highest grade reported across all immunizations received. Denominators are the number of subjects with at least one laboratory record available at the specified visit across all immunizations. Grading is based upon the U.S. Department of Health and Human Services Food and Drug Administration Center for Biologics Evaluation and Research guidelines titled 'Guidance for Industry Toxicity Grading Scale for Healthy Adult and Adolescent Volunteers Enrolled in Preventive Vaccine Clinical Trials' 2007.

a Baseline is defined as the measurement taken just prior to immunization on the day of first immunization.

b The day of immunization measurement for immunizations 2, 3, 4, or 5 was taken prior to the administration of vaccine on that day.

c Laboratory results for Day 21 were only scheduled for the final immunization (i.e., Immunization 5 for Groups 1 and 2 or Immunization 3 for Group 3).

d The maximum severity post-baseline is the highest grade reported by a subject after the day of first immunization.

e Subject 1035 had unscheduled neutrophil, platelet, and WBC lab abnormalities within 28 days of an immunization that exceeded the maximum grade reported at one of the scheduled visits included in this table. See the accompanying listing for more details on Subject 1035's lab abnormalities.

| <i>Parameter/Grade</i> | <i>Baseline<sup>a</sup><br/>(Day of<br/>immunization 1)<br/>n/N (%)</i> | <i>Day of<br/>immunization<br/>2, 3, 4, or 5<sup>b</sup><br/>n/N (%)</i> | <i>Day 2<br/>post-imm<br/>n/N (%)</i> | <i>Day 7<br/>post-imm<br/>n/N (%)</i> | <i>Day 21<br/>post-imm<sup>c</sup><br/>n/N (%)</i> | <i>Max severity<br/>post-baseline<sup>d</sup><br/>n/N (%)</i> |
|------------------------|-------------------------------------------------------------------------|--------------------------------------------------------------------------|---------------------------------------|---------------------------------------|----------------------------------------------------|---------------------------------------------------------------|
| <b>BUN</b>             |                                                                         |                                                                          |                                       |                                       |                                                    |                                                               |
| Grade 0                | 44/44 (100)                                                             | 45/45 (100)                                                              | 43/45 (96)                            | 44/45 (98)                            | 42/42 (100)                                        | 42/45 (93)                                                    |
| Grade 1                | 0                                                                       | 0                                                                        | 2 (4)                                 | 1 (2)                                 | 0                                                  | 3 (7)                                                         |
| Grade 2                | 0                                                                       | 0                                                                        | 0                                     | 0                                     | 0                                                  | 0                                                             |
| Grade 3                | 0                                                                       | 0                                                                        | 0                                     | 0                                     | 0                                                  | 0                                                             |
| <b>Creatinine</b>      |                                                                         |                                                                          |                                       |                                       |                                                    |                                                               |
| Grade 0                | 45/45 (100)                                                             | 42/45 (93)                                                               | 40/45 (89)                            | 40/45 (89)                            | 40/42 (95)                                         | 38/45 (84)                                                    |
| Grade 1                | 0                                                                       | 3 (7)                                                                    | 5 (11)                                | 5 (11)                                | 2 (5)                                              | 7 (16)                                                        |
| Grade 2                | 0                                                                       | 0                                                                        | 0                                     | 0                                     | 0                                                  | 0                                                             |
| Grade 3                | 0                                                                       | 0                                                                        | 0                                     | 0                                     | 0                                                  | 0                                                             |
| <b>Hemoglobin</b>      |                                                                         |                                                                          |                                       |                                       |                                                    |                                                               |
| Grade 0                | 39/45 (87)                                                              | 38/45 (84)                                                               | 35/45 (78)                            | 33/45 (73)                            | 34/42 (81)                                         | 30/45 (67)                                                    |
| Grade 1                | 4 (9)                                                                   | 5 (11)                                                                   | 7 (16)                                | 10 (22)                               | 5 (12)                                             | 11 (24)                                                       |
| Grade 2                | 2 (4)                                                                   | 2 (4)                                                                    | 2 (4)                                 | 2 (4)                                 | 3 (7)                                              | 3 (7)                                                         |
| Grade 3                | 0                                                                       | 0                                                                        | 1 (2)                                 | 0                                     | 0                                                  | 1 (2)                                                         |
| <b>Neutrophils</b>     |                                                                         |                                                                          |                                       |                                       |                                                    |                                                               |
| Grade 0                | 44/45 (98)                                                              | 43/45 (96)                                                               | 39/45 (87)                            | 42/45 (93)                            | 38/42 (90)                                         | 39/45 (87)                                                    |
| Grade 1                | 0                                                                       | 1 (2)                                                                    | 3 (7)                                 | 1 (2)                                 | 3 (7)                                              | 2 (4)                                                         |
| Grade 2                | 1 (2)                                                                   | 1 (2)                                                                    | 3 (7)                                 | 2 (4)                                 | 1 (2)                                              | 4 (9) <sup>e</sup>                                            |
| Grade 3                | 0                                                                       | 0                                                                        | 0                                     | 0                                     | 0                                                  | 0                                                             |
| <b>Platelets</b>       |                                                                         |                                                                          |                                       |                                       |                                                    |                                                               |
| Grade 0                | 45/45 (100)                                                             | 43/45 (96)                                                               | 42/45 (93)                            | 43/45 (96)                            | 42/42 (100)                                        | 42/45 (93) <sup>e</sup>                                       |
| Grade 1                | 0                                                                       | 1 (2)                                                                    | 2 (4)                                 | 2 (4)                                 | 0                                                  | 2 (4)                                                         |
| Grade 2                | 0                                                                       | 1 (2)                                                                    | 1 (2)                                 | 0                                     | 0                                                  | 1 (2)                                                         |
| Grade 3                | 0                                                                       | 0                                                                        | 0                                     | 0                                     | 0                                                  | 0                                                             |

Subjects in Group 1 and 2 received up to five immunizations and subjects in Group 3 received up to three immunizations. Subjects are counted at most once under a column according to the highest grade reported across all immunizations received. Denominators are the number of subjects with at least one laboratory record available at the specified visit across all immunizations. Grading is based upon the U.S. Department of Health and Human Services Food and Drug Administration Center for Biologics Evaluation and Research guidelines titled 'Guidance for Industry Toxicity Grading Scale for Healthy Adult and Adolescent Volunteers Enrolled in Preventive Vaccine Clinical Trials' 2007.

a Baseline is defined as the measurement taken just prior to immunization on the day of first immunization.

b The day of immunization measurement for immunizations 2, 3, 4, or 5 was taken prior to the administration of vaccine on that day.

c Laboratory results for Day 21 were only scheduled for the final immunization (i.e., Immunization 5 for Groups 1 and 2 or Immunization 3 for Group 3).

d The maximum severity post-baseline is the highest grade reported by a subject after the day of first immunization.

e Subject 1035 had unscheduled neutrophil, platelet, and WBC lab abnormalities within 28 days of an immunization that exceeded the maximum grade reported at one of the scheduled visits included in this table. See the accompanying listing for more details on Subject 1035's lab abnormalities.

| <i>Parameter/Grade</i> | <i>Baseline<sup>a</sup></i><br><i>(Day of</i><br><i>immunization 1)</i><br><i>n/N (%)</i> | <i>Day of</i><br><i>immunization</i><br><i>2, 3, 4, or 5<sup>b</sup></i><br><i>n/N (%)</i> | <i>Day 2</i><br><i>post-imm</i><br><i>n/N (%)</i> | <i>Day 7</i><br><i>post-imm</i><br><i>n/N (%)</i> | <i>Day 21</i><br><i>post-imm<sup>c</sup></i><br><i>n/N (%)</i> | <i>Max severity</i><br><i>post-baseline<sup>d</sup></i><br><i>n/N (%)</i> |
|------------------------|-------------------------------------------------------------------------------------------|--------------------------------------------------------------------------------------------|---------------------------------------------------|---------------------------------------------------|----------------------------------------------------------------|---------------------------------------------------------------------------|
| <b>WBC</b>             |                                                                                           |                                                                                            |                                                   |                                                   |                                                                |                                                                           |
| Grade 0                | 43/45 (96)                                                                                | 42/45 (93)                                                                                 | 37/45 (82)                                        | 41/45 (91)                                        | 38/42 (90)                                                     | 36/45 (80)                                                                |
| Grade 1 (low)          | 2 (4)                                                                                     | 2 (4)                                                                                      | 7 (16)                                            | 3 (7)                                             | 4 (10)                                                         | 6 (13)                                                                    |
| Grade 2 (low)          | 0                                                                                         | 0                                                                                          | 1 (2)                                             | 0                                                 | 0                                                              | 1 (2)                                                                     |
| Grade 3 (low)          | 0                                                                                         | 0                                                                                          | 0                                                 | 0                                                 | 0                                                              | 0                                                                         |
| Grade 1 (high)         | 0                                                                                         | 0                                                                                          | 0                                                 | 0                                                 | 0                                                              | 0                                                                         |
| Grade 2 (high)         | 0                                                                                         | 1 (2)                                                                                      | 0                                                 | 1 (2)                                             | 0                                                              | 2 (4) <sup>e</sup>                                                        |
| Grade 3 (high)         | 0                                                                                         | 0                                                                                          | 0                                                 | 0                                                 | 0                                                              | 0                                                                         |

Subjects in Group 1 and 2 received up to five immunizations and subjects in Group 3 received up to three immunizations. Subjects are counted at most once under a column according to the highest grade reported across all immunizations received. Denominators are the number of subjects with at least one laboratory record available at the specified visit across all immunizations. Grading is based upon the U.S. Department of Health and Human Services Food and Drug Administration Center for Biologics Evaluation and Research guidelines titled 'Guidance for Industry Toxicity Grading Scale for Healthy Adult and Adolescent Volunteers Enrolled in Preventive Vaccine Clinical Trials' 2007.

a Baseline is defined as the measurement taken just prior to immunization on the day of first immunization.

b The day of immunization measurement for immunizations 2, 3, 4, or 5 was taken prior to the administration of vaccine on that day.

c Laboratory results for Day 21 were only scheduled for the final immunization (i.e., Immunization 5 for Groups 1 and 2 or Immunization 3 for Group 3).

d The maximum severity post-baseline is the highest grade reported by a subject after the day of first immunization.

e Subject 1035 had unscheduled neutrophil, platelet, and WBC lab abnormalities within 28 days of an immunization that exceeded the maximum grade reported at one of the scheduled visits included in this table. See the accompanying listing for more details on Subject 1035's lab abnormalities.

| <i>Parameter/Grade</i> | <i>Day of<br/>immunization<br/>n/N (%)</i> | <i>Day 2<br/>n/N (%)</i> | <i>Day 7<br/>n/N (%)</i> | <i>Day 21<sup>a</sup><br/>n/N (%)</i> | <i>Max severity<br/>post-imm<sup>b</sup><br/>n/N (%)</i> |
|------------------------|--------------------------------------------|--------------------------|--------------------------|---------------------------------------|----------------------------------------------------------|
| <b>Creatinine</b>      |                                            |                          |                          |                                       |                                                          |
| Grade 0                | 185/ 190 (97)                              | 184/ 189 (97)            | 180/ 190 (95)            | 40/ 42 (95)                           | 176/ 190 (93)                                            |
| Grade 1                | 5 (3)                                      | 5 (3)                    | 10 (5)                   | 2 (5)                                 | 14 (7)                                                   |
| Grade 2                | 0                                          | 0                        | 0                        | 0                                     | 0                                                        |
| Grade 3                | 0                                          | 0                        | 0                        | 0                                     | 0                                                        |
| <b>Hemoglobin</b>      |                                            |                          |                          |                                       |                                                          |
| Grade 0                | 166/ 190 (87)                              | 162/ 189 (86)            | 167/ 190 (88)            | 34/ 42 (81)                           | 153/ 190 (81)                                            |
| Grade 1                | 16 (8)                                     | 20 (11)                  | 18 (9)                   | 5 (12)                                | 27 (14)                                                  |
| Grade 2                | 8 (4)                                      | 6 (3)                    | 5 (3)                    | 3 (7)                                 | 9 (5)                                                    |
| Grade 3                | 0                                          | 1 (1)                    | 0                        | 0                                     | 1 (1)                                                    |
| <b>Neutrophils</b>     |                                            |                          |                          |                                       |                                                          |
| Grade 0                | 186/ 190 (98)                              | 181/ 189 (96)            | 185/ 190 (97)            | 38/ 42 (90)                           | 180/ 190 (95)                                            |
| Grade 1                | 2 (1)                                      | 5 (3)                    | 3 (2)                    | 3 (7)                                 | 4 (2)                                                    |
| Grade 2                | 2 (1)                                      | 3 (2)                    | 2 (1)                    | 1 (2)                                 | 6 (3)                                                    |
| Grade 3                | 0                                          | 0                        | 0                        | 0                                     | 0                                                        |
| <b>Platelets</b>       |                                            |                          |                          |                                       |                                                          |
| Grade 0                | 187/ 190 (98)                              | 183/ 189 (97)            | 186/ 190 (98)            | 42/ 42 (100)                          | 184/ 190 (97)                                            |
| Grade 1                | 2 (1)                                      | 4 (2)                    | 4 (2)                    | 0                                     | 4 (2)                                                    |
| Grade 2                | 1 (1)                                      | 2 (1)                    | 0                        | 0                                     | 2 (1)                                                    |
| Grade 3                | 0                                          | 0                        | 0                        | 0                                     | 0                                                        |
| <b>WBC</b>             |                                            |                          |                          |                                       |                                                          |
| Grade 0                | 185/ 190 (97)                              | 178/ 189 (94)            | 185/ 190 (97)            | 38/ 42 (90)                           | 177/ 190 (93)                                            |
| Grade 1 (high)         | 0                                          | 0                        | 0                        | 0                                     | 0                                                        |
| Grade 1 (low)          | 4 (2)                                      | 10 (5)                   | 4 (2)                    | 4 (10)                                | 11 (6)                                                   |
| Grade 2 (high)         | 1 (1)                                      | 0                        | 1 (1)                    | 0                                     | 1 (1)                                                    |
| Grade 2 (low)          | 0                                          | 1 (1)                    | 0                        | 0                                     | 1 (1)                                                    |
| Grade 3 (high)         | 0                                          | 0                        | 0                        | 0                                     | 0                                                        |
| Grade 3 (low)          | 0                                          | 0                        | 0                        | 0                                     | 0                                                        |

Subjects are counted multiple times under each column according to available laboratory data and the number of immunizations received (e.g., a subject who received three immunizations and has no missing data for the scheduled timepoints is counted three times under each column). Denominators are the number of laboratory records available for the specified timepoint across all subjects and immunizations.

a Laboratory results for Day 21 were only scheduled for the final immunization (i.e., immunization 5 for Groups 1 and 2 or immunization 3 for Group 3).

b The maximum severity post-immunization is the highest grade reported by a subject across all parameters within a given immunization.



**Table S11b – Laboratory abnormalities: Subject #1035 (Group 3)**

| Group   | Subject ID | Study visit                 | Platelets<br>140-400 x10 <sup>3</sup> /uL |                 | Neutrophils<br>1500-7800 cells/uL |                 | WBC<br>3.8-10.8 x10 <sup>3</sup> /uL |                 |
|---------|------------|-----------------------------|-------------------------------------------|-----------------|-----------------------------------|-----------------|--------------------------------------|-----------------|
|         |            |                             | Val                                       | Gr <sup>a</sup> | Val                               | Gr <sup>a</sup> | Val                                  | Gr <sup>a</sup> |
| Group 3 | 1035       | Screening                   | 243                                       | 0               | 1776                              | 0               | 4.0                                  | 0               |
|         |            | Immunization 1              | 232                                       | 0               | 2148                              | 0               | 4.7                                  | 0               |
|         |            | Immunization 1, Day 2       | 233                                       | 0               | 2244                              | 0               | 5.5                                  | 0               |
|         |            | Immunization 1, Day 7       | 217                                       | 0               | 16135                             | 0               | 19.3                                 | 2               |
|         |            | Unscheduled (Imm 1, Day 10) | 216                                       | 0               | 18360                             | 0               | 23.3                                 | 3*              |
|         |            | Unscheduled (Imm 1, Day 15) | 154                                       | 0               | 2024                              | 0               | 4.4                                  | 0               |
|         |            | Unscheduled (Imm 1, Day 16) | 138                                       | 1*              | 672                               | 3*              | 2.8                                  | -1              |
|         |            | Unscheduled (Imm 1, Day 18) | 140                                       | 0               | 858                               | 3*              | 3.3                                  | -1              |
|         |            | Unscheduled (Imm 1, Day 21) | 207                                       | 0               | 577                               | 3*              | 3.7                                  | -1              |
|         |            | Unscheduled (Imm 1, Day 25) | 305                                       | 0               | 1312                              | 1               | 4.1                                  | 0               |
|         |            | Immunization 2              | 254                                       | 0               | 2336                              | 0               | 6.1                                  | 0               |
|         |            | Immunization 2, Day 2       | 249                                       | 0               | 1642                              | 0               | 4.2                                  | 0               |
|         |            | Immunization 2, Day 7       | 244                                       | 0               | 1982                              | 0               | 5.4                                  | 0               |
|         |            | Unscheduled (Imm 2, Day 9)  | 260                                       | 0               | 2795                              | 0               | 6.5                                  | 0               |
|         |            | Unscheduled (Imm 2, Day 20) | 237                                       | 0               | 2507                              | 0               | 6.1                                  | 0               |
|         |            | Immunization 3              | 225                                       | 0               | 1593                              | 0               | 4.4                                  | 0               |
|         |            | Immunization 3, Day 2       | 199                                       | 0               | 1148                              | 2               | 3.5                                  | -1              |
|         |            | Immunization 3, Day 7       | 230                                       | 0               | 1512                              | 0               | 4.5                                  | 0               |
|         |            | Unscheduled (Imm 3, Day 10) | 232                                       | 0               | 1758                              | 0               | 3.7                                  | -1              |
|         |            | Unscheduled (Imm 3, Day 14) | 272                                       | 0               | 1488                              | 1               | 3.5                                  | -1              |
|         |            | Immunization 3, Day 21      | 275                                       | 0               | 1261                              | 1               | 3.3                                  | -1              |

All available laboratory data within 28 days of an immunization are displayed for subjects that had at least one unscheduled measurement within 28 days of an immunization that had a grade higher than the maximum grade reported at one of the scheduled visits. The grade for an unscheduled visit meeting these criteria are indicated by an asterisk (\*). The normal range for each parameter is provided under the parameter name.

a Grade: 1=mild, 2=moderate, 3=severe, 4=life-threatening. Grading is based upon the U.S. Department of Health and Human Services Food and Drug Administration Center for Biologics Evaluation and Research guidelines titled 'Guidance for Industry Toxicity Grading Scale for Healthy Adult and Adolescent Volunteers Enrolled in Preventive Vaccine Clinical Trials' 2007. Per the guidelines, platelets and neutrophils are not graded for abnormalities above the normal range. WBCs are graded for abnormalities both below and above the normal range. WBC graded abnormalities with values below the normal range are shown with a negative grade.

**Table S12. Results of potency and sporozoite membrane integrity assays on two lots of PfSPZ Vaccine used in the WRAIR 2080 clinical trial**

| <i>Lot #</i> | <i>Time Point</i>          | <i>Potency (# of parasites expressing PflSA-1/well)</i> | <i>% Viability (Sporozoite Membrane Integrity Assay)</i> |
|--------------|----------------------------|---------------------------------------------------------|----------------------------------------------------------|
| <b>1</b>     | <b>Fresh (Nov. 2013)</b>   | 466 ± 17                                                | 98.6%                                                    |
|              | <b>Release (Nov. 2013)</b> | 422 ± 41                                                | 88.5% ± 2.3%                                             |
|              | 3 Months                   | 439 ± 18                                                | 84.4% ± 0.7%                                             |
|              | 6 Months (Pre-Use)         | 347 ± 27                                                | 86.4% ± 5.2%                                             |
|              | 9 Months (Post-Use)        | 432 ± 67                                                | 82.5% ± 1.0%                                             |
| <b>2</b>     | <b>Fresh (May 2014)</b>    | 408 ± 11                                                | 98.2%                                                    |
|              | <b>Release (May 2014)</b>  | 368 ± 3                                                 | 89.9% ± 1.4%                                             |
|              | 3 Months (Pre-Use)         | 413 ± 38                                                | 89.0% ± 1.3%                                             |
|              | 6 Months                   | 377 ± 41                                                | 85.5% ± 1.5%                                             |
|              | 9 Months (Post-Use)        | 409 ± 3                                                 | 84.3% ± 0.6%                                             |

For the 3-day hepatocyte potency assay,  $4.0 \times 10^4$  HC-04 (1F9) cells/well in triplicate were infected with  $2.5 \times 10^4$  PfSPZ for 3 hours, washed, and incubated for 3 days with daily media change. Liver stage parasites expressing PflSA-1 were counted after staining the slides with a polyclonal antibody against PflSA-1 and fluorescently labeled secondary antibody. For the sporozoite membrane integrity assay, propidium iodide and SYBR<sup>®</sup> Green were added to  $1.5 \times 10^4$  PfSPZ. PfSPZ were applied to a hemocytometer and incubated in a dark humidity chamber for 20 min, at which point the red PfSPZ (those with compromised membranes) and green PfSPZ (those with intact membranes) in 16 quadrants were counted under a fluorescent microscope. Those with intact membranes were considered viable, and viability is expressed as the total green PfSPZ over the total number of PfSPZ counted  $\times 100$ . Fresh PfSPZ were assessed prior to cryopreservation. Cryopreserved PfSPZ were assessed several days later for release of each lot, and stability was assessed at defined time points after cryopreservation.

**Table S13:** ELISA measuring antibodies against proteins expressed in sporozoites (PfCSP, PfSSP2/TRAP, PfCelTOS, PfMSP5, PfAMA1), early liver stages (PfEXP1 and PfLSA1) and late liver/blood stages (PfMSP1 and PfEBA175)

| Recombinant Protein Details                          |                                                                                                                                                                                                                                                                                                                                                                                                                                                                                       |                 |                 |                 |                 |                 |                 |                 |                 |
|------------------------------------------------------|---------------------------------------------------------------------------------------------------------------------------------------------------------------------------------------------------------------------------------------------------------------------------------------------------------------------------------------------------------------------------------------------------------------------------------------------------------------------------------------|-----------------|-----------------|-----------------|-----------------|-----------------|-----------------|-----------------|-----------------|
| PfCSP                                                | The recombinant <i>P. falciparum</i> (Pf) circumsporozoite protein (rPfCSP, 3D7 strain) is a 48 kDa protein with an N-terminal sequence SLGEND, approximately 299 amino acids in length, without the signal sequence. The 1 <sup>st</sup> amino acid is residue 50 at the N-terminus and comprising both the the N- and C-portions with 22 NANP and 4 NVDP repeats, without the last 13 amino acids of the C-terminal portion. GenBank Accession No.: ADF48458.1 (Protein Potential). |                 |                 |                 |                 |                 |                 |                 |                 |
| PfSSP2/TRAP                                          | The recombinant Pf sporozoite surface protein 2 (recombinant fragment of PfSSP2, 3D7) is a 27 kDa protein. The rPfSSP2 lacks the hydrophobic regions at the amino terminus (22 aa) and the C-terminus (63 aa). The sequence selected for expression is the entire extracellular domain of PfSSP2, which includes the A-type domain (of von Willebrand factor) and the type 1 repeat of thrombospondin (TSR). GenBank Accession No.: AAC18657.1 (Protein Potential).                   |                 |                 |                 |                 |                 |                 |                 |                 |
| PfMSP5                                               | The recombinant Pf merozoite surface protein-5 is a 40-kDa protein that is located on the merozoite surface and is non-covalently associated with merozoite surface protein 1 (MSP1) complex shed from the surface at erythrocyte invasion. GenBank Accession No: AAF12722.1 (Ross Coppel, Monash University, Australia) (1).                                                                                                                                                         |                 |                 |                 |                 |                 |                 |                 |                 |
| PfCelTOS                                             | The recombinant Pf cell-traversal protein for ookinetes and sporozoites (rPfCelTOS) is an 18 kDa protein with an N-terminal sequence FRGNNG. It is approximately 151 amino acids in length, with the first amino acid being residue 25 at the N-terminus without the hydrophobic signal sequence. GenBank Accession No.: BAD97684.1 (Protein Potential).                                                                                                                              |                 |                 |                 |                 |                 |                 |                 |                 |
| PfMSP1                                               | PfMSP142 (EcMSP142-3D7, Lot# WRAIR11150, 0.99 mg/mL) is a recombinant of the C-terminal 42-kDa portion of the merozoite surface protein-1 (PfMSP1) from the 3D7 strain of Pf expressed, refolded, and purified at the Walter Reed Army Institute of Research (WRAIR) Pilot Bioproduction Facility. GenBank Accession Number: ABS84655.1 (WRAIR).                                                                                                                                      |                 |                 |                 |                 |                 |                 |                 |                 |
| PfAMA1                                               | The recombinant Pf apical membrane antigen-1 PfAMA1 (rPfAMA1-3D7, Lot# MV-1187 Final Bulk Protein, 1.00 mg/mL). The precursor of AMA1 is processed proteolytically, to cleave away the pro-sequence, converting the protein into a 66 kDa form, which allows the merozoite relocation. GenBank Accession No: AAN35928.1 (Carole Long, NIAID, NIH).                                                                                                                                    |                 |                 |                 |                 |                 |                 |                 |                 |
| PfEBA175                                             | The recombinant Pf erythrocyte binding antigen 175 (rPfEBA175 RII, Lot# 321-0904-007, 2.38 mg/mL) region II with an N-terminal sequence GRQTSS, approximately 616 amino acids in length. GenBank Accession No.: AAF72186.1 (Protein Potential).                                                                                                                                                                                                                                       |                 |                 |                 |                 |                 |                 |                 |                 |
| PfLSA1                                               | PfLSA1 (recombinant 52-kDa Lot# 061907, 0.50 mg/mL). The recombinant Pf liver stage antigen-1, PfLSA1 is a 20-kDa protein with an N-terminal sequence KENKLN, approximately 259 amino acids in length, the first amino acid being residue 28 at the N-terminus and truncated at residue 286 at the C-terminus. GenBank Accession No.: AAW78332.1 (Protein Potential).                                                                                                                 |                 |                 |                 |                 |                 |                 |                 |                 |
| PfEXP1                                               | Pf exported protein-1 (rPfEXP1, 23-kDaLot# 010507, 1.00 mg/mL).<br>The recombinant Pf exported protein-1 is a 23 kDa protein with an N-terminal sequence SLAEKT and is approximately 143 amino acids in length, without the hydrophobic signal sequence removed. GenBank Accession No.: CAA28735.1 (Protein Potential).                                                                                                                                                               |                 |                 |                 |                 |                 |                 |                 |                 |
| Assay Details                                        |                                                                                                                                                                                                                                                                                                                                                                                                                                                                                       |                 |                 |                 |                 |                 |                 |                 |                 |
| Pf Proteins                                          | CSP                                                                                                                                                                                                                                                                                                                                                                                                                                                                                   | SSP2            | MSP5            | CelTOS          | MSP1            | AMA1            | EB175           | LSA1            | EXP1            |
| Coating antigen concentration in 50 $\mu$ L per well | 2.0 $\mu$ g /mL                                                                                                                                                                                                                                                                                                                                                                                                                                                                       | 1.5 $\mu$ g /mL | 2.0 $\mu$ g /mL | 1.5 $\mu$ g /mL | 1.5 $\mu$ g /mL | 2.0 $\mu$ g /mL | 1.0 $\mu$ g /mL | 1.0 $\mu$ g /mL | 0.5 $\mu$ g /mL |
| Washing Buffer                                       | 1X Imidizole-based wash solution containing 2 mM imidazole, 160 mM NaCl, 0.02% Tween 20, 0.5 mM EDTA (3 times after each incubations)                                                                                                                                                                                                                                                                                                                                                 |                 |                 |                 |                 |                 |                 |                 |                 |
| Blocking buffer composition (diluent)                | 1% Bovine Serum Albumin (BSA) blocking buffer (KPL)                                                                                                                                                                                                                                                                                                                                                                                                                                   |                 |                 |                 |                 |                 |                 |                 |                 |
|                                                      | 1% milk                                                                                                                                                                                                                                                                                                                                                                                                                                                                               | 5% milk         | 1% milk         | 5% milk         | 5% milk         | 1% milk         | 5% milk         | 1% milk         | 1% milk         |
| Serum                                                | 1:100 starting dilution and three fold serial dilution in triplicate                                                                                                                                                                                                                                                                                                                                                                                                                  |                 |                 |                 |                 |                 |                 |                 |                 |
| Secondary ab                                         | Peroxidase labeled goat anti-human IgG (KPL)                                                                                                                                                                                                                                                                                                                                                                                                                                          |                 |                 |                 |                 |                 |                 |                 |                 |

|                                         |                           |         |         |         |         |         |         |         |         |
|-----------------------------------------|---------------------------|---------|---------|---------|---------|---------|---------|---------|---------|
| Secondary ab $\mu\text{g/mL}$           | 0.1                       | 0.1     | 0.1     | 0.1     | 0.05    | 0.1     | 0.05    | 0.2     | 0.1     |
| Substrate                               | ABTS Peroxidase substrate |         |         |         |         |         |         |         |         |
| Substrate incubation period (room temp) | 75 mins                   | 60 mins | 75 mins | 60 mins | 60 mins | 75 mins | 60 mins | 60 mins | 50 mins |

**Figure. S1.** Genetic distance between *P. falciparum* isolates. The first two coordinates of a principal coordinates analysis (PCoA) are shown, reflecting genetic distance among PfNF54 (black), Pf7G8 (green), and 19 clinical isolates from Mali (dark red), Ghana (red), Malawi (orange), Uganda (goldenrod), and Kenya (yellow). Whole genome sequence data from each sample (Table S1) were aligned to the Pf3D7 genome assembly (PlasmoDB v24) with bowtie2 (2). Alignments were converted to BAM files (3) and processed for duplicate read removal using picard tools (<http://picard.sourceforge.net/>). SNP calls were then generated using GATK and according to GATK's Best Practices documentation, including indel realignment and quality score recalibration steps (4, 5). An additional high-stringency filter was applied to the initial SNP set to remove false positives based on quality scores (QUAL), depth (DP), strand bias (FS), and mapping quality (MQ0). The filter used is defined as follows:  $(DP < 12 \parallel QUAL < 50 \parallel FS > 14.5 \parallel (MQ0 \geq 2 \&\& (MQ0/(1.0 * DP)) > 0.1))$ . This filter is conservative, and may result in an underestimation of the number of true SNPs. The total number of SNPs in each sample relative to the reference Pf 3D7 genome assembly was identified with this approach. In order to determine the relative distance between all isolates and strains and Pf3D7, SNPs for all samples were filtered according to a panel of 944,270 bi-allelic positions identified in protein-coding regions of the Pf genome, a SNP panel validated by the Sanger Institute (6). Pairwise distances were estimated based only on the high-confidence SNPs in this panel, and for positions called in all samples. Custom Python and R scripts were used to create a pairwise distance matrix based on the SNP calls, and to format data for the PCoA. Coordinate 1 separates African samples by longitude, from West to East Africa; in addition, Pf7G8, from South America, clusters with samples from West Africa, as expected, since the introduction of Pf to South America is believed to be associated with the slave trade from West Africa (7). The second coordinate separates Pf7G8 from the African samples. The first and second coordinates explain 8% and 7% of the variation in the data, respectively.

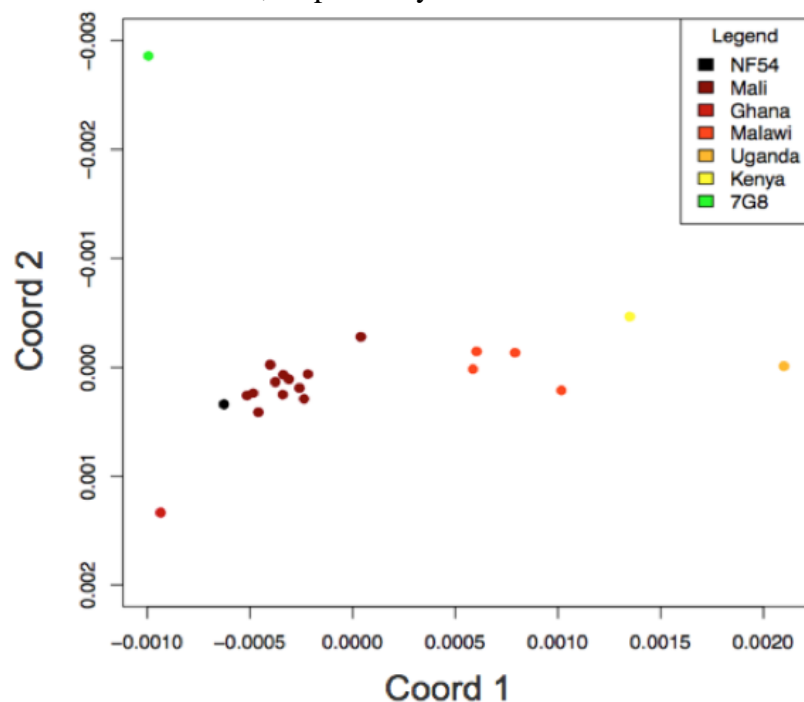

**Figure S2.** IgM and IgG antibodies against PfSPZ for all 33 volunteers in Groups 1-3 who received the full dosage regimen and underwent CHMI #1 in sera taken two weeks after the last dose of PfSPZ Vaccine. The median AFU  $2 \times 10^5$  levels are delineated. Median IgG antibody levels were 11.2-fold higher than median IgM antibody levels.

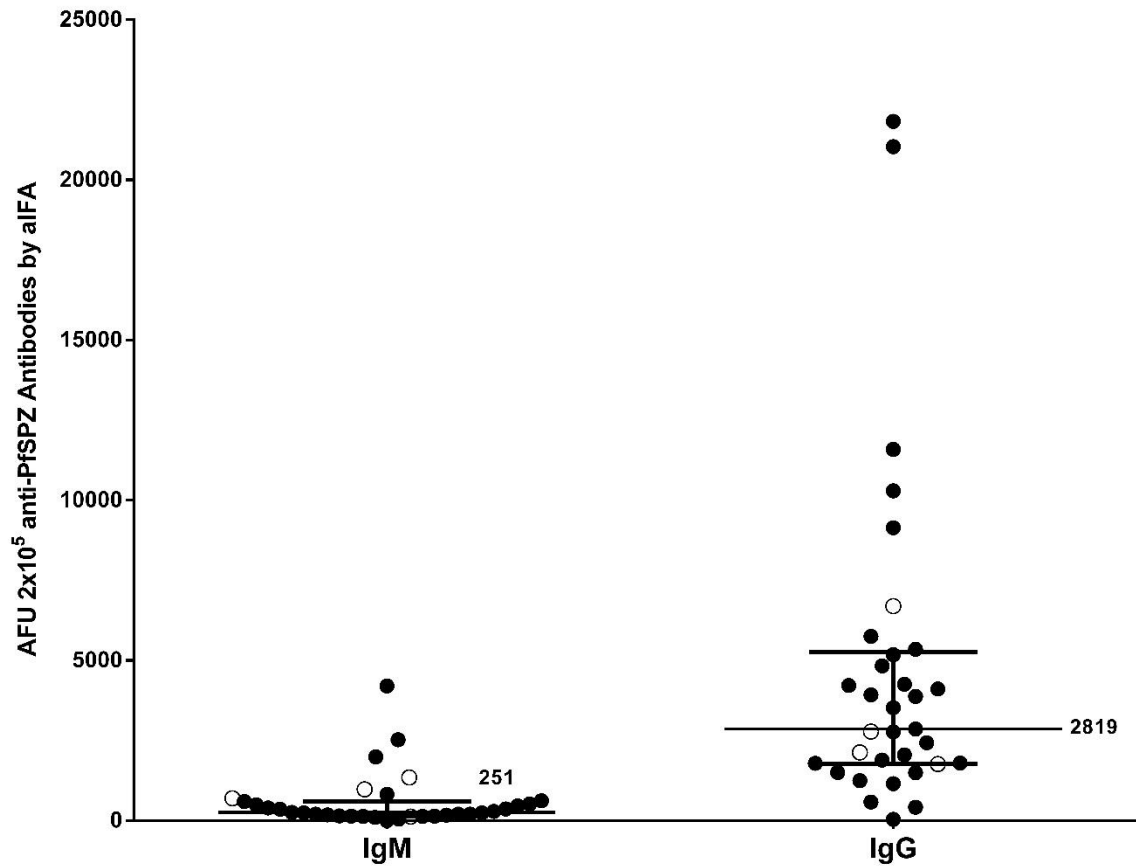

**Figure. S3. Cellular immune responses to stimulation with synthetic peptides from multiple Pf proteins.** Peptide-specific circulating peripheral blood mononuclear cells (PBMC) secreting single cytokines; IFN $\gamma$  only, IL2 only, or IFN $\gamma$ +IL2, were evaluated in the FluoroSpot assay (see Methods) after stimulation with pools of synthetic peptides [PfCSP (A), PfAMA1 (B), PfSSP2/TRAP (C), PfCelTOS (D)]. For each of the 3 study groups, Group 1, Group 2, and Group 3, individual volunteer responses are recorded as spot forming cells per 10<sup>6</sup> PBMC (SFC/10<sup>6</sup> PBMC). Pre-immunization responses were subtracted from the post immunization peptide responses shown which include 2 weeks post dose 1, pre-CHMI #1, and pre-CHMI #2. Protected subjects are shown as filled symbols and not protected subjects are shown as unfilled symbols. For each of the 3 groups, the interquartile ranges and the median values of responses of subjects against each test antigen in each group are shown. There is no statistically significant association between any response and protection.

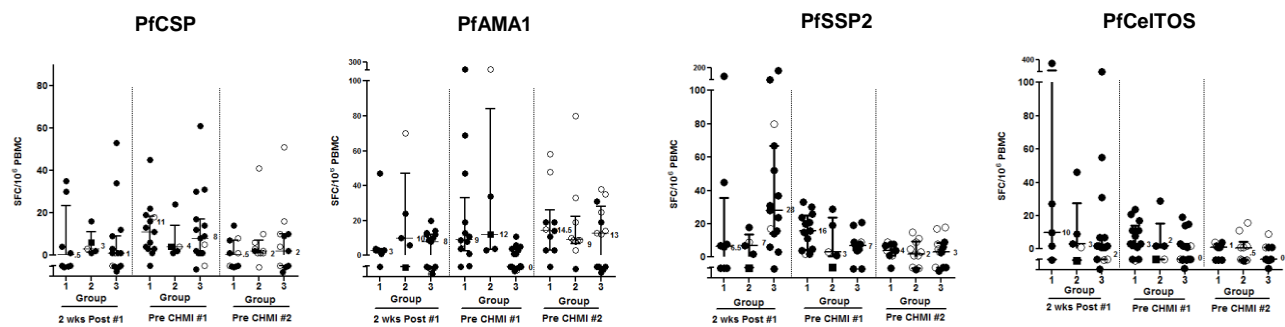

## **2. Supplementary Materials and Methods:**

### **PfSPZ Vaccine**

PfSPZ Vaccine, composed of aseptic, purified, cryopreserved, metabolically active, radiation-attenuated PfSPZ, was manufactured as described using Pf NF54 parasites (8-11) and met all quality control release and stability assay specifications (Table S12). Two different lots of PfSPZ Vaccine, manufactured in November 2013 and May 2014, were used in this trial.

### **Study Design**

The primary study endpoints were (1) incidence and type of adverse events (AEs), including breakthrough infections or abnormal vital signs, clinical laboratory assessments, physical examination findings, and (2) evidence of vaccine-mediated protection against CHMI 3 weeks and 24 weeks after last immunization in Groups 1, 2, and 3, by preventing blood stage infection for 28 days (as detected by thick blood smear analysis and confirmed by PCR) following CHMI.

### **Assessment of Tolerability and Safety**

PfSPZ Vaccine. All subjects receiving at least one dose of vaccine were included in the immunization phase tolerability and safety analyses. Grading of AEs was based upon the CBER guidelines entitled “Guidance for Industry Toxicity Grading Scale for Healthy Adult and Adolescent Volunteers Enrolled in Preventive Vaccine Clinical Trials” 2007 (<http://www.fda.gov/cber/guidelines.htm>). In general, grading was as follows: Grade 1(mild): Does not interfere with routine activities, minimal level of discomfort; Grade 2 (moderate): Interferes with routine activities, moderate level of discomfort; Grade 3(severe): Unable to



perform routine activities, significant level of discomfort; Grade 4 (potentially life-threatening): Hospitalization or ER visit for potentially life-threatening event. Solicited adverse events (AEs) were collected for 7 days following each immunization. Unsolicited AEs for the immunization phase were collected for 28 days following each immunization except the final immunization; unsolicited AEs for the final immunization were collected until the day of first CHMI.

CHMI. Solicited AEs were collected from the day of exposure to PfSPZ-infected mosquitoes through day 28 after exposure. AEs occurring during the first 6 days after initiation of CHMI were potentially attributed to exposure to PfSPZ-infected mosquitoes. Those occurring from days 7-28 were considered potentially attributable to malaria.

Metrics for injection pain were calculated as a proportion of the total number of immunizations administered. Safety was assessed by calculating the proportion of immunized subjects in each group who experienced vaccine-, mosquito bite-, or malaria-related (definitely, probably, or possibly) mild, moderate, severe, or serious AEs as defined by symptoms, clinical signs, breakthrough infections, or laboratory values. To further define risk factors for AEs, proportions were compared within groups (by dose installment) and across groups (by dose installment and overall). The Safety Monitoring Committee (SMC) assessed safety data after first immunization with  $4.5 \times 10^5$  PfSPZ of PfSPZ Vaccine.

Safety was assessed by calculating the percentage of subjects in each group who experienced vaccine-related (definitely, probably, or possibly) AEs and laboratory abnormalities. AEs are presented within groups (by dose) and across groups (by dose and overall). Subjects are presented by group according to the vaccine dose received, with Groups 1 and 2 combined (identical 5 dose regimens,  $2.7 \times 10^5$  PfSPZ per dose). Where safety data are presented by grade,

subjects were counted under the maximum grade experienced for the specified event and immunization.

### **Assessment of Protective Efficacy Against CHMI**

All immunized subjects who received at least three scheduled immunizations were eligible to participate in CHMI. Real time quantitative DNA polymerase chain reaction (qPCR) was done retrospectively on blood collected at the time of each TBS in those who developed parasitemia, and on days 11, 18, and 28 after CHMI in those who did not develop parasitemia as previously described (12, 13). Subjects who became parasitemic post-CHMI were treated with a 3-day course of atovaquone/proguanil (Malarone) and considered cured of Pf after two sequential daily negative TBSs.

### **Assessment of Immunological Responses**

*Antibody Assays:* Sera were assessed for vaccine-induced antibodies by enzyme linked immunosorbent assay (ELISA), immunofluorescence assay (IFA), and inhibition of sporozoite invasion (ISI) assay (10, 11).

***Enzyme Linked Immunosorbent Assay (ELISA):*** ELISAs were performed for antigens first expressed in 1) sporozoites (PfCSP, PfSSP2/TRAP, PfCelTOS, PfMSP5, PfAMA1), 2) early liver stages (PfEXP1 and PfSLSA1) and 3) late liver stages (PfMSP1 and PfEBA175). The ELISA methods for each antigen are described below.

***ELISA Procedure:*** Recombinant (r) proteins used in ELISA assays are listed in Table S13. 96-well plates (Nunc Maxisorp Immuno Plate) were coated overnight at 4°C with 2.0 µg

recombinant proteins in 50  $\mu$ L per well in coating buffer (KPL). Plates were washed three times with 1X Imidazole-based wash solution containing 2 mM imidazole, 160 mM NaCl, 0.02% Tween 20, 0.5 mM EDTA and blocked with 1% Bovine Serum Albumin (BSA) blocking buffer (KPL) containing 1% or 5% non-fat dry milk (Table S13) for 1 h at 37 °C. Plates were washed three times and serially diluted serum samples (in triplicates) were added and incubated at 37 °C for 1 h. After three washes, peroxidase labeled goat anti-human IgG (KPL) was added at a dilution of 0.1  $\mu$ g/mL and incubated at 37°C for 1 hour. Plates were washed three times, ABTS Peroxidase substrate was added for plate development, and the plates were incubated for designated periods (Table S13) at 22°C room temperature. The plates were read with a Spectramax Plus384 microplate reader (Molecular Devices) at 405 nm. The data were collected using Softmax Pro GXP v5 and fit to a 4-parameter logistic curve, to calculate the serum dilution at OD 1.0. To serve as an assay control a negative control (pooled serum from non-immune individuals from malaria free area) was always included. Positive controls varied for each antigen as follows:

- a. PfCSP : Serum from an individual with anti-PfCSP antibodies
- b. PfLSA-1: Pooled serum from individuals immunized against PfLSA-1 (DMID)
- c. PfEBA-175: Pooled serum from individuals immunized against PfLSA-1 (DMID)
- d. PfAMA1, PfEXP1, PfMSP-1: Pooled serum of volunteers from a malaria-endemic area (Kenya blood bank)

Samples were considered positive if the difference between the post-immunization OD 1.0 and the pre-immunization OD 1.0 (net OD 1.0) was  $> 50$  and the ratio of post-immunization OD 1.0 to pre-immunization OD 1.0 (ratio) was  $> 3$ .

The half-life of anti-PfCSP antibodies was calculated using the following formula:

$t_{1/2} = \frac{(t_1 - t_0) \ln 2}{\ln\left(\frac{N_0}{N_1}\right)}$ , where  $t_{1/2}$  is the half-life of anti-PfCSP antibodies,  $t_1 - t_0$  is the elapsed time in weeks between time points,  $N_0$  is the net OD 1.0 anti-PfCSP ELISA at time  $t_0$ , and  $N_1$  is the net OD 1.0 anti-PfCSP ELISA at time  $t_1$ .

*Inhibition of antibodies to rPfCSP by (NANP)<sub>6</sub>*: We assessed antibodies to rPfCSP and (NANP)<sub>6</sub> by ELISA in sera taken 2 weeks after the third dose of PfSPZ Vaccine from 14 subjects in Group 3 who underwent CHMI #1. To assess inhibition by (NANP)<sub>6</sub>, the sera was pre-incubated with 500 ng (NANP)<sub>6</sub> for 120 minutes and reactivity against (NANP)<sub>6</sub> or rPfCSP was assessed by ELISA.

***Automated Immunofluorescence Assay (aIFA):***

*Preparation of slides with air-dried PfSPZ*: Purified PfSPZ (NF54 strain) from aseptic *A. stephensi* mosquitoes produced by Sanaria were resuspended in phosphate buffered saline (PBS, pH 7.4) to obtain  $0.5 \times 10^4$  PfSPZ per 40  $\mu$ L. 40  $\mu$ L ( $0.5 \times 10^4$  PfSPZ) were added to each well of Granier cellstar clear bottom black 96 well plates (Sigma-Aldrich). After addition of the suspension, plates were left at room temperature for 12-18 h for air-drying.

*IFA procedure*: 50  $\mu$ L of sera diluted in PBS with 2% BSA were added to each well of the 96-well plate containing air-dried PfSPZ. Sera samples were added at 2-fold dilutions starting at 1:50. After adding samples, plates were incubated at 37 °C for 1 h. Plates were washed in PBS three times on an Aquamax Microplate washer. Alexa Fluor 488 conjugated goat anti-human IgG (Molecular Probes) was diluted to 1:250 in PBS with 2 % BSA and 50  $\mu$ L was added to each well. For assessment of IgM titers, Alexa Fluor 488 conjugated goat anti-human IgM (Molecular Probes) was diluted to 1:250 in PBS with 2 % BSA and 50  $\mu$ L was added to each well. The plates were then incubated for 1 h at 37 °C. Plates were washed three times with PBS on an Aquamax Microplate washer. 100  $\mu$ L PBS was added to each well. The plates were sealed using

a plate sealer and stored in the dark at 4 °C until data acquisition. Samples were assessed by scanning the plates using an Acumen eX3 laser scanning imaging cytometer. The positive control was pooled human serum taken two weeks after the last immunization from 12 protected volunteers immunized 4 or 5 times with PfSPZ Vaccine in the VRC 312 clinical trial (11). The Acumen image cytometer scans the entire surface area of each well in a 96-well plate and the fluorescence intensity values (arbitrary units) therefore represent the signal from all  $0.5 \times 10^4$  PfSPZ that were seeded in each well.

*Analysis and readout:* The data obtained from Acumen image cytometer was plotted to fit a 4-parameter sigmoidal curve in GraphPad Prism software using serum dilution (log transformed) as the x-axis variable and arbitrary fluorescence units (AFU) on the y axis. Over many iterations during development of this assay we have determined that sera from naïve volunteers in the USA and Europe, including pre-immune sera, always register an arbitrary fluorescence value less than  $2.0 \times 10^5$  even at the highest concentration (1:50 dilution, see above) used in this assay. Moreover, for sera that do bind to PfSPZ,  $2.0 \times 10^5$  AFU falls in the exponential portion of their sigmoidal curves. Therefore  $2.0 \times 10^5$  has been chosen as a threshold in the aIFA assay and the results for each volunteer for antibodies to PfSPZ are reported as the reciprocal serum dilution at which fluorescence intensity was equal to  $2.0 \times 10^5$  AFU.

***Inhibition of Sporozoite Invasion Assay (ISI):*** HC-04 (1F9) cells (hepatocytes) (14) were cultured in complete medium (10% FBS in DMEM/F12 with 100 units/mL penicillin and 100 µg/mL streptomycin; Gibco by Life Technologies) in (Entactic-Collagen IV-Laminin) ECL-coated 96-well clear bottom black well plates (Greiner Bio-One North America) at a density of  $2.5 \times 10^4$  cells per well, and incubated for 24 h at 37°C, 5% CO<sub>2</sub> with 85% relative humidity.

Twenty-four h later cells were infected with  $10^4$  aseptic, purified, cryopreserved PfSPZ per well, with or without sera diluted 1:5 from subjects immunized with PfSPZ Vaccine. The assay control included PfSPZ added with media alone. All subjects were assessed at pre-immunization (baseline) and pre-CHMI (post immunization with PfSPZ Vaccine-prior to CHMI) time points. Three hours later PfSPZ that had not invaded the HC-04 cells were removed by washing three times with Dulbecco's phosphate-buffered saline (DPBS), and the cultures were fixed using 4% paraformaldehyde for 15 min at room temperature. Differential immunostaining was performed to differentiate between PfSPZ inside the hepatocytes versus PfSPZ outside the hepatocytes. PfSPZ outside the hepatocytes were stained with an anti-PfCSP mAb (2A10, 6.86  $\mu\text{g/mL}$ ) (Protein Potential LLC, with permission from New York University School of Medicine) conjugated with Alexa Fluor 633 (far-red) (1  $\mu\text{g/mL}$ ; custom-conjugated at GenScript®), a 1:500X dilution. The hepatocytes were then permeabilized with 0.1% Triton X-100 for 15 min at room temperature, and the PfSPZ inside the hepatocytes were stained with the anti-PfCSP mAb (2A10, 6.86  $\mu\text{g/mL}$ ) conjugated with Alexa Fluor 488 (green; 1  $\mu\text{g/mL}$ , conjugated from Genscript), a 1:500X dilution. The numbers of infected hepatocytes (green only) were counted by scanning the plates using an Acumen eX3 laser scanning imaging cytometer. Percent inhibition was calculated by the following formula,

$$\frac{(\text{No. PfSPZ invaded in presence of pre-immune serum}) - (\text{No. PfSPZ invaded in presence of pre-CHMI serum})}{(\text{No. of PfSPZ invaded in presence of pre-immune serum})} \times 100$$

The number of invaded PfSPZ scored in this assay in the absence of sera ranges from 400 – 600. Pre-immune sera at a 1:5 dilution can reduce this to a range of 300 – 500 invaded PfSPZ. Typically, the difference in invasion inhibition activity is highest between the pre and post-immune sera at a dilution of 1:5 therefore this dilution was chosen to report the assay results.

Cellular Immunology Assays: Antigen-specific circulating peripheral blood mononuclear cells (PBMC) secreting single or multiple cytokines were evaluated using pre-coated FluoroSpot plates and kits purchased from Mabtech (Mabtech AB, Nacka Strand, Sweden). Plates and kits were used according to the manufacturer's instructions. A modification of previously described methods used in ELISpot was followed (15). Briefly, PBMCs were isolated by Ficoll density centrifugation of fresh, anticoagulated (collected in EDTA tubes) whole blood.  $4 \times 10^5$  PBMC were suspended in 100  $\mu$ L complete medium (RPMI-1640 supplemented with 1% penicillin/streptomycin, 1% glutamine, 1% MEM NEAA [all from GIBCO, Grand Island, NY], and 10% human AB serum [SIGMA]) and incubated in the FluoroSpot plates with  $2.5 \times 10^4$  irradiated (150 Gy), aseptic, purified, cryopreserved PfSPZ suspended in 100  $\mu$ L of complete medium. The PfSPZ were manufactured, cryopreserved and thawed by the identical procedures used to produce PfSPZ Vaccine. Additional wells were stimulated with synthetic peptides purchased from Chiron Technologies, Clayton, Victoria, Australia. Full-length PfCSP, PfAMAI, PfSSP2/TRAP, and PfCelTOS amino acid sequences were covered by a series of 15 amino acid (aa) peptides overlapping by 11 aa. These were combined into a single pool for each antigen, which ranged in number from 43 to 153 peptides. The total number of 15 aa peptides pooled into a single pool for PfCSP, PfAMAI, PfSSP2/TRAP, and PfCelTOS were 65, 153, 132, and 43 respectively.

CEF-Class I Peptide Pool Plus (CTL, Ohio, USA) consisting of 32 peptides corresponding to defined HLA class I-restricted T cell epitopes from cytomegalovirus, Epstein-Barr virus and influenza virus was used as an internal control for each subject. PHA, a mitogen, was used as a

positive control for cell viability. Negative control unstimulated PBMCs wells received medium only.

Cultures were incubated for 36 h at 37°C in 5% CO<sub>2</sub>. Each PBMC sample was assayed in triplicate and the number of single-staining IFN $\gamma$ - and IL-2-secreting cells and double-staining IFN $\gamma$  and IL-2-secreting cells were recognized as spot-forming cells (SFC) and enumerated using an automated FluoroSpot reader (AID iSpot, GmbH, Germany). For each triplicate, outliers were rejected if any single value contributed more than 50% of the standard deviation of the triplicate and if its value was three-fold greater or less than the average of the remaining two values. After removing outliers, the mean number of SFCs obtained in negative control wells (no antigen) was subtracted from the value of each test well. Negative counts generated by this background subtraction were converted to zero. The mean SFCs of the test sample was then calculated and expressed as SFCs/10<sup>6</sup> PBMCs.



### 3. Supplementary Results

#### **Ease of Administration, Tolerability and Safety:**

Of the 190 total immunizations received, 73% were associated with no pain, 24% were associated with mild pain, and 3% were associated with moderate pain. The subjects assessed 42% of the immunizations to be less painful than other injections received in the subject's lifetime. All but 8 of the 190 immunizations were performed with 1 stick (Table S7). Preparing each syringe (which is done in a biological safety cabinet) took an average of 5 minutes, and injecting the prepared syringe by DVI an average of 1.5 minutes including prepping the arm for the injection. Actual needle insertion and injection generally took 10 to 15 seconds (data not shown).

There were 66 solicited AEs considered to be possibly, probably, or definitely related (designated "related") to immunization. Of the 66 AEs, 11 were local to the site of injection, and 55 were systemic. Of the 45 immunized subjects, 24 subjects (53%) experienced at least one solicited AE considered related to the vaccine (Table S8). Overall, 13% of subjects experienced a local AE, 4/30 (13%) in Groups 1 and 2 and 2/15 (13%) in Group 3. Likewise, 47% of subjects experienced a systemic AE, 13/30 (43%) in Groups 1 and 2 and 8/15 (53%) in Group 3. There was no difference in the overall rates between lower dose Groups 1 and 2 (16/30 (53%) immunized subjects) and higher dose Group 3 (8/15 (53%) immunized subjects) (Table S8).

Eighteen (40%) of subjects, 14 subjects in Groups 1 and 2 (47%) and 4 in Group 3 (27%), reported a total of 24 possibly, probably, or definitely related unsolicited adverse events. As with solicited AEs, there were no dose-related effects. No Grade 3 or serious adverse event that was considered possibly, probably, or definitely related was reported (Table S8).

When AE's were broken down by immunization, there were no trends of increasing or decreasing AE frequencies as immunizations progressed, for either Groups 1 and 2 (percent of subjects experiencing local AEs over the five immunizations: 7%, 0%, 3%, 0% and 4%; percent of subjects experiencing systemic AEs over the five immunizations: 17%, 30%, 7%, 14%, and 4%), or Group 3 (percent of subjects experiencing local AEs over the three immunizations: 7%, 7% and 13%; percent of subjects experiencing systemic AEs over the three immunizations: 33%, 27%, 20%) (Table S9).

The most frequently reported related solicited AE was headache, occurring in 38% of subjects, followed by fatigue (16%), malaise (11%), myalgia (9%), arthralgia (7%), chills (4%), nausea (4%) and diarrhea (2%) (Table S10a). The most frequent local AE was pain, occurring in 9% of subjects, followed by tenderness (4%), erythema (2%), induration (2%) and swelling (2%). The majority of related solicited AEs resolved within a day. All AEs except 5 were mild (Grade 1). The only Grade 2 AEs were arthralgia (2 events in 2 subjects), headache (2 events in 2 subjects), and fatigue. When specific AEs were broken down by immunizations (Table S10b-f), there were no trends of increasing or decreasing rates for a given AE evident.

No breakthrough malaria infections occurred during immunization. No subjects became pregnant during the trial.

Laboratory abnormalities are listed separately from "adverse events". Six subjects (20%) in Groups 1 and 2 and 4 (27%) in Group 3 had at least one grade 2 laboratory abnormality within 7 days of any immunization (Table S11a). One additional subject who received  $2.7 \times 10^5$  PfSPZ had a grade 3 decrease in hemoglobin, which occurred 2 days after fourth immunization. This subject had low hemoglobin prior to the first immunization, which persisted throughout the trial. One subject in Group 3 (Subject #1035) had an asymptomatic grade 3 leukocytosis (with

neutrophilia) detected 8 days after the first immunization determined to be possibly related to immunization), followed by leukopenia, neutropenia and thrombocytopenia (Table S11b). The subject remained asymptomatic and continued with immunizations uneventfully and without a recurrence. The most common hematology and chemistry abnormalities were decreased hemoglobin and decreased white blood cell count and elevated AST and ALT.

Adverse events occurring in the 28 days after each CHMI were consistent with what was expected after exposure to mosquito bites and acquisition of malaria infection.

#### 4. References

1. Marshall VM, Tieqiao W, and Coppel RL. Close linkage of three merozoite surface protein genes on chromosome 2 of *Plasmodium falciparum*. *Mol Biochem Parasitol*. 1998;94(1):13-25.
2. Langmead B, and Salzberg SL. Fast gapped-read alignment with Bowtie 2. *Nat Methods*. 2012;9(4):357-9.
3. Li H, Handsaker B, Wysoker A, Fennell T, Ruan J, Homer N, Marth G, Abecasis G, Durbin R, and Genome Project Data Processing S. The Sequence Alignment/Map format and SAMtools. *Bioinformatics*. 2009;25(16):2078-9.
4. DePristo MA, Banks E, Poplin R, Garimella KV, Maguire JR, Hartl C, Philippakis AA, del Angel G, Rivas MA, Hanna M, et al. A framework for variation discovery and genotyping using next-generation DNA sequencing data. *Nat Genet*. 2011;43(5):491-8.
5. Van der Auwera GA, Carneiro MO, Hartl C, Poplin R, Del Angel G, Levy-Moonshine A, Jordan T, Shakir K, Roazen D, Thibault J, et al. From FastQ data to high confidence variant calls: the Genome Analysis Toolkit best practices pipeline. *Curr Protoc Bioinformatics*. 2013;11(1110):11 0 1- 0 33.
6. Manske M, Miotto O, Campino S, Auburn S, Almagro-Garcia J, Maslen G, O'Brien J, Djimde A, Doumbo O, Zongo I, et al. Analysis of *Plasmodium falciparum* diversity in natural infections by deep sequencing. *Nature*. 2012;487(7407):375-9.
7. Yalcindag E, Elguero E, Arnathau C, Durand P, Akiana J, Anderson TJ, Aubouy A, Balloux F, Besnard P, Bogreau H, et al. Multiple independent introductions of *Plasmodium falciparum* in South America. *Proc Natl Acad Sci U S A*. 2012;109(2):511-6.
8. Ponnudurai T, Meuwissen JH, Leeuwenberg AD, Verhave JP, and Lensen AH. The production of mature gametocytes of *Plasmodium falciparum* in continuous cultures of different isolates infective to mosquitoes. *Trans R Soc Trop Med Hyg*. 1982;76(242-50).
9. Hoffman SL, Billingsley P, James E, Richman A, Loyevsky M, Li T, Charkravarty S, Gunasekera A, Chattopadhyay R, Li M, et al. Development of a metabolically active, non-replicating sporozoite vaccine to prevent *Plasmodium falciparum* malaria. *Human Vaccines*. 2010;6(1):97-106.
10. Epstein JE, Tewari K, Lyke KE, Sim BK, Billingsley PF, Laurens MB, Gunasekera A, Chakravarty S, James ER, Sedegah M, et al. Live attenuated malaria vaccine designed to protect through hepatic CD8+T cell immunity. *Science*. 2011;334(6055):475-80.
11. Seder RA, Chang LJ, Enama ME, Zephir KL, Sarwar UN, Gordon IJ, Holman LA, James ER, Billingsley PF, Gunasekera A, et al. Protection against malaria by intravenous immunization with a nonreplicating sporozoite vaccine. *Science*. 2013;341(6152):1359-65.
12. Kamau E, Alemayehu S, Feghali KC, Saunders D, and Ockenhouse CF. Multiplex qPCR for detection and absolute quantification of malaria. *PLoS One*. 2013;8(8):e71539.
13. Kamau E, Alemayehu S, Feghali KC, Juma DW, Blackstone GM, Marion WR, Obare P, Ogutu B, and Ockenhouse CF. Sample-ready multiplex qPCR assay for detection of malaria. *Malar J*. 2014;13(158).
14. Sattabongkot J, Yimamnuaychoke N, Leelaudomlipi S, Rasameesoraj M, Jenwithisuk R, Coleman RE, Udomsangpetch R, Cui L, and Brewer TG. Establishment of a human hepatocyte line that supports in vitro development of the exo-erythrocytic stages of the

- malaria parasites *Plasmodium falciparum* and *P. vivax*. *Am J Trop Med Hyg*. 2006;74(5):708-15.
15. Sedegah M, Tamminga C, McGrath S, House B, Ganeshan H, Lejano J, Abot E, Banania GJ, Sayo R, Farooq F, et al. Adenovirus 5-vectored *P. falciparum* vaccine expressing CSP and AMA1. Part A: safety and immunogenicity in seronegative adults. *PLoS One*. 2011;6(10):e24586.

## 5. Additional Acknowledgements

We thank the Sanaria and Protein Potential Teams for manufacture of investigational products, PfSPZ Vaccine and diluents, production of Pf7G8 CHMI mosquitoes, preparation of vaccine at the clinical site, regulatory, quality and site activities, performance of assays, and production of PfSPZ for T cell studies including: A. Richman, J. Jackson, H. Huang, A. Awe, M. King, M. Orozco, A. Patil, S. Matheny, J. Overby, Y. Wen, K. Nelson, B. Jiang, L. Gao, R. Xu, E. Fomumbod, M. Laskowski, T. Wai, Faith Beams, R. Douglas, R.C. Thompson, M. Fishbein and A. Hoffman. We are grateful to the following at WRAIR: 1) the Clinical Trials Team which includes W. Spencer, A. Castellano, C. Washington, R. Newcomer, L. Zhu, E. Sondergaard, L. Corado, K. Akerele, A. Robichaud, C. Payne, G. Fornillos and M. Ahmed, 2) the Entomology Team which includes T. Savransky, M. Dowler and P. Mc Ardle, 3) S. Alemayhu (qPCR laboratory) and 4) J. Livezy and M. Wojnarski (Clinical Pharmacology). We thank the NMRC Clinical Immunology Team (including S. Inoue and R. Velasco) and NMRC Administration (K. Gillens and D. Elam). We are grateful for work of the Microscopy Team, which included J. Bolton, F. Farooq, R. Danner and E. Smith (NMRC), J. Komisar (WRAIR) and J. Noveras (USUHS). Our thanks to J. Price (USUHS) for assistance with manuscript figures. Our thanks to C. Lucas of Naval Medical Research Unit-6 in Lima, Peru for assistance with slide reading. We thank C. V. Plowe of the University of MD. We thank U.S. Army Medical Materiel development Activity (D. Rwakasyaguri, J. Witt, and P. Mongelli) for development of and assistance with the database, and Statistics Collaborative Inc. (including A. Tillman) for assistance with data analysis and reporting. We thank the members of our Safety Monitoring Committee (A. Durbin, K. Kester, and M. Riddle), our research monitor (N. Teneza-Mora of NMRC), and Data Safety Solutions (O. Jinadu, P. Sheladi, and S. Mathias) for assistance with external monitoring. We thank NMRC's Advanced Medical Development Program (S. Parker and K. Prusaczyk) for their support. The views expressed in this article are those of the authors and do not necessarily reflect the official policy or position of the Department of the Navy, Department of Defense, nor the U.S. Government. J. Epstein, A. Singer, K. Paolino, J. Moon, P. Twomey, R. Ruck, S. Davidson, B. Hickey, S.

Remich and J. Regules are military service members. This work was prepared as part of their official duties. Title 17 U.S.C. §105 provides that ‘Copyright protection under this title is not available for any work of the United States Government.’ Title 17 U.S.C. §101 defines a U.S. Government work as a work prepared by a military service member or employee of the U.S. Government as part of that person’s official duties. We gratefully acknowledge J. Inglese and P. Dranchak, Division of Pre-Clinical Innovation, National Center for Advancing Translation Sciences, National Institutes of Health, Rockville, MD, for continuing scientific and technical support on use of the Acumen eX3 laser-scanning image cytometer for ISI and aIFA assays with clinical sera.

**Table S1. Metadata and SNP count relative to 3D7 for 19 clinical isolates and 2 culture-adapted strains of *P. falciparum*.** Data obtained from Genbank's Short Read Archive (<http://www.ncbi.nlm.nih.gov/sra/>), and pulled by Experiment Accession ID.

| Sample Accession ID              | Experiment Accession ID         | Source | Read Count  | Bases (Gpb) | Genome Coverage <sup>a</sup> | Total SNPs <sup>b</sup> | SNP Panel <sup>c</sup> |
|----------------------------------|---------------------------------|--------|-------------|-------------|------------------------------|-------------------------|------------------------|
| SAMN02374945                     | SRX364110                       | Mali   | 13,746,800  | 1.4         | 60                           | 17,544                  | 4,330                  |
| SAMN02373818                     | SRX363947                       | Mali   | 17,199,480  | 1.7         | 75                           | 18,834                  | 4,322                  |
| SAMN02373653                     | SRX363851                       | Mali   | 16,876,880  | 1.7         | 73                           | 23,824                  | 4,576                  |
| SAMN02373819                     | SRX363957                       | Mali   | 21,376,140  | 2.2         | 93                           | 23,181                  | 4,767                  |
| SAMN02373656                     | SRX363863                       | Mali   | 17,426,280  | 1.8         | 76                           | 24,033                  | 4,632                  |
| SAMN02373820                     | SRX363963                       | Mali   | 19,739,780  | 2.0         | 86                           | 23,800                  | 4,552                  |
| SAMN02373821                     | SRX363972                       | Mali   | 14,439,220  | 1.5         | 63                           | 20,673                  | 4,502                  |
| SAMN02373822                     | SRX363979                       | Mali   | 22,572,540  | 2.3         | 98                           | 20,845                  | 4,462                  |
| SAMN02374901                     | SRX364033                       | Mali   | 22,217,920  | 2.2         | 96                           | 20,380                  | 4,420                  |
| SAMN02374900                     | SRX364020                       | Mali   | 34,062,020  | 3.4         | 148                          | 21,210                  | 4,556                  |
| SAMN02374902                     | SRX364039                       | Mali   | 14,143,340  | 1.4         | 61                           | 19,580                  | 4,426                  |
| SAMN02374907                     | SRX364050                       | Mali   | 17,353,440  | 1.8         | 75                           | 21,190                  | 4,571                  |
| SAMEA679437                      | ERX005736, ERX007433            | Ghana  | 129,305,774 | 9.8         | 422                          | 23,515                  | 4,906                  |
| SAMEA679680                      | ERX004689, ERX005050            | Uganda | 40,801,074  | 3.1         | 133                          | 22,416                  | 4,918                  |
| SAMEA678966                      | ERX007459, ERX008950            | Kenya  | 58,056,936  | 4.8         | 189                          | 22,909                  | 4,927                  |
| IGS-MLW-001                      | Awaiting SRA #                  | Malawi | 30,179,568  | 3.0         | 131                          | 22,436                  | 4,670                  |
| IGS-MLW-002                      |                                 | Malawi | 36,578,884  | 3.7         | 159                          | 21,852                  | 4,590                  |
| IGS-MLW-003                      |                                 | Malawi | 28,665,742  | 2.9         | 124                          | 21,817                  | 4,774                  |
| IGS-MLW-004                      |                                 | Malawi | 36,874,068  | 3.7         | 160                          | 23,199                  | 4,666                  |
| SAMN01737343 (NF54) <sup>d</sup> | SRX113472, SRX111834            | Africa | 62,292,174  | 6.2         | 270                          | 55                      | 0                      |
| SAMN00765682 (7G8) <sup>d</sup>  | SRX208839, SRX113476, SRX111831 | Brazil | 65,542,020  | 6.6         | 284                          | 22,056                  | 4,925                  |

<sup>a</sup> Genome coverage calculated as: (read count x read length) / length of Pf reference genome.

<sup>b</sup> Total number of SNPs that pass the high-stringency filter used (see methods in Fig. S1).

<sup>c</sup> Subset of all SNPs that fall within the ~1M SNP panel validated by the Sanger Institute (see methods in Fig. S1).

<sup>d</sup> Culture-adapted strain.
